# Supplementary material for: Water compatible silica supported iron trifluoroacetate and trichloroacetate: as prominent and recyclable Lewis acid catalysts for solvent-free green synthesis of hexahydroquinoline-3-carboxamides
Source: Royal Society of Chemistry journal article supplement (doi:10.1039/d3ra03542e), 2023-01-01
Supplement: d3ra03542e1.pdf [file d3ra03542e1.pdf]

# **Water compatible silica supported Iron trifluoroacetate and trichloroacetate: As the prominent and recyclable Lewis acid catalysts for solvent-free green synthesis of hexahydroquinoline-3-carboxamides**

Dnyaneshwar Purushottam Gholap<sup>1</sup>, Ramdas Huse<sup>1</sup>, Sudarshan Dipake<sup>1</sup> and Dr. M. K. Lande<sup>1\*</sup>

<sup>1</sup>Department of Chemistry, Dr. Babasaheb Ambedkar Marathwada University, Aurangabad, Maharashtra, India.

\*Corresponding Author: Email Id: mkl\_chem@yahoo.com

## **Supporting Information**

### **Content**

1. Validation of Green metrics for synthesized organic derivatives 5a-l.
2. <sup>1</sup>H, <sup>13</sup>C NMR, FTIR, Mass spectra of the organic derivatives.

## 1. Validation of Green metrics for synthesized organic derivatives (5a-l)

### Calculation of green metrics

**Table 1:** Materials used for green metrics calculation

| Reactant 1                                          | Reactant 2                                          | Reactant 3                                                                | Reactant 4                                        |
|-----------------------------------------------------|-----------------------------------------------------|---------------------------------------------------------------------------|---------------------------------------------------|
| Benzaldehyde<br>0.50gm (Mol. Wt. = 106.12)          | Acetoacetanilide<br>0.83 gm (Mol.<br>Wt. = 177.20). | 5, 5-dimethyl-1, 3-<br>cyclohexanedione<br>0.66 gm (Mol. Wt.<br>= 140.18) | Ammonium acetate<br>0.43 gm (Mol. Wt.<br>= 77.08) |
| 4-methoxybenzaldehyde<br>0.64gm (Mol. Wt. = 136.15) |                                                     |                                                                           |                                                   |
| 4-methybenzaldehyde<br>0.56gm (Mol. Wt. = 120.15)   |                                                     |                                                                           |                                                   |
| 4-bromobenzaldehyde<br>0.87gm (Mol. Wt. = 185.03)   |                                                     |                                                                           |                                                   |
| 4-fluoroobenzaldehyde<br>0.58gm (Mol. Wt. = 124.11) |                                                     |                                                                           |                                                   |
| 4-chlorobenzaldehyde<br>0.66gm (Mol. Wt. = 140.57)  |                                                     |                                                                           |                                                   |
| 4-nitrobenzaldehyde<br>0.71gm (Mol. Wt. = 151.12)   |                                                     |                                                                           |                                                   |
| 4-hydroxybenzaldehyde<br>0.57gm (Mol. Wt. = 122.12) |                                                     |                                                                           |                                                   |
| 2-chlorobenzaldehyde<br>0.66gm (Mol. Wt. = 140.57)  |                                                     |                                                                           |                                                   |
| 2-bromobenzaldehyde<br>0.87gm (Mol. Wt. = 185.03)   |                                                     |                                                                           |                                                   |
| 3-bromobenzaldehyde<br>0.87gm (Mol. Wt. = 185.03)   |                                                     |                                                                           |                                                   |
| 3-nitrobenzaldehyde<br>0.71gm (Mol. Wt. = 151.12)   |                                                     |                                                                           |                                                   |

### Analysis of green metrics

The following listed formulae were used for calculating the E-factor, Atom economy (AE), Reaction mass efficiency (RME), Effective mass yield (EMY), and Optimum efficiency (OE).

The Calculated data for compounds 5a-l are presented in Table 2. Calculation of green chemistry metrics for one representative entry, viz. 5a

- **E-factor** = Total mass waste (g) / Mass of product  
= Total input (g) – Total output (g) / Total output (g)  
e.g. For the product 5a; E-factor =  $(0.5 \text{ gm} + 0.83 \text{ gm} + 0.66 \text{ gm} + 0.43 \text{ gm}) - 1.79 / 1.79$   
= 0.35
- **Atom Economy (%)** = (Mol. wt. of product) / (Total mol. wt. of reactants) x 100  
e.g. For the product 5a; AE =  $(386.49) / (106.12 + 177.20 + 140.18 + 77.08) \times 100$   
=  $(386.49) / (500.58) \times 100$   
= 77 %
- **Reaction mass efficiency (%)** = (Mass of crude product) / (Total mass of reactant) x 100  
e.g. For the product 5a; RME =  $(1.79) / (0.5 \text{ gm} + 0.83 \text{ gm} + 0.66 \text{ gm} + 0.43 \text{ gm}) \times 100$   
=  $(1.79) / (2.42 \text{ gm}) \times 100$   
= 74 %
- **Effective mass yield (%)** = (Mass of Product) / (Mass of non-benign reagents) x 100  
e.g. For the product 5a; EMY =  $(1.79) / (2.42 \text{ gm}) \times 100$   
= 74 %
- **Optimum efficiency (%)** = Reaction mass efficiency / Atom economy x 100  
e.g. For the product 5a; OE =  $(74) / (77) \times 100$   
= 96 %

**Table 2:** Green metrics calculation data

| Entry | Product | E-factor | Atom Economy (AE) | Reaction Mass Efficiency (RME) | % Effective Mass Yield (EMY) | % Optimum Efficiency (OE) |
|-------|---------|----------|-------------------|--------------------------------|------------------------------|---------------------------|
| 1.    | 5a      | 0.35     | 77%               | 74%                            | 74%                          | 96%                       |
| 2.    | 5b      | 0.33     | 78%               | 75%                            | 75%                          | 96%                       |
| 3.    | 5c      | 0.38     | 78%               | 72%                            | 72%                          | 92%                       |
| 4.    | 5d      | 0.35     | 80%               | 74%                            | 74%                          | 93%                       |
| 5.    | 5e      | 0.40     | 78%               | 71%                            | 71%                          | 91%                       |
| 6.    | 5f      | 0.37     | 78%               | 73%                            | 73%                          | 93%                       |
| 7.    | 5g      | 0.40     | 79%               | 71%                            | 71%                          | 90%                       |
| 8.    | 5h      | 0.38     | 78%               | 72%                            | 72%                          | 92%                       |
| 9.    | 5i      | 0.39     | 78%               | 72%                            | 72%                          | 92%                       |
| 10.   | 5j      | 0.36     | 80%               | 73%                            | 73%                          | 91%                       |
| 11.   | 5k      | 0.38     | 80%               | 72%                            | 72%                          | 90%                       |
| 12.   | 5l      | 0.42     | 79%               | 70%                            | 70%                          | 89%                       |

**Note:** Since the silica supported Iron trifluoroacetate Lewis acid catalyst was recovered from the reaction protocol, their amount is not included in the calculations of green metrics.

## 2. $^1\text{H}$ , $^{13}\text{C}$ NMR, FTIR, Mass spectra of the organic derivatives (5a-l)

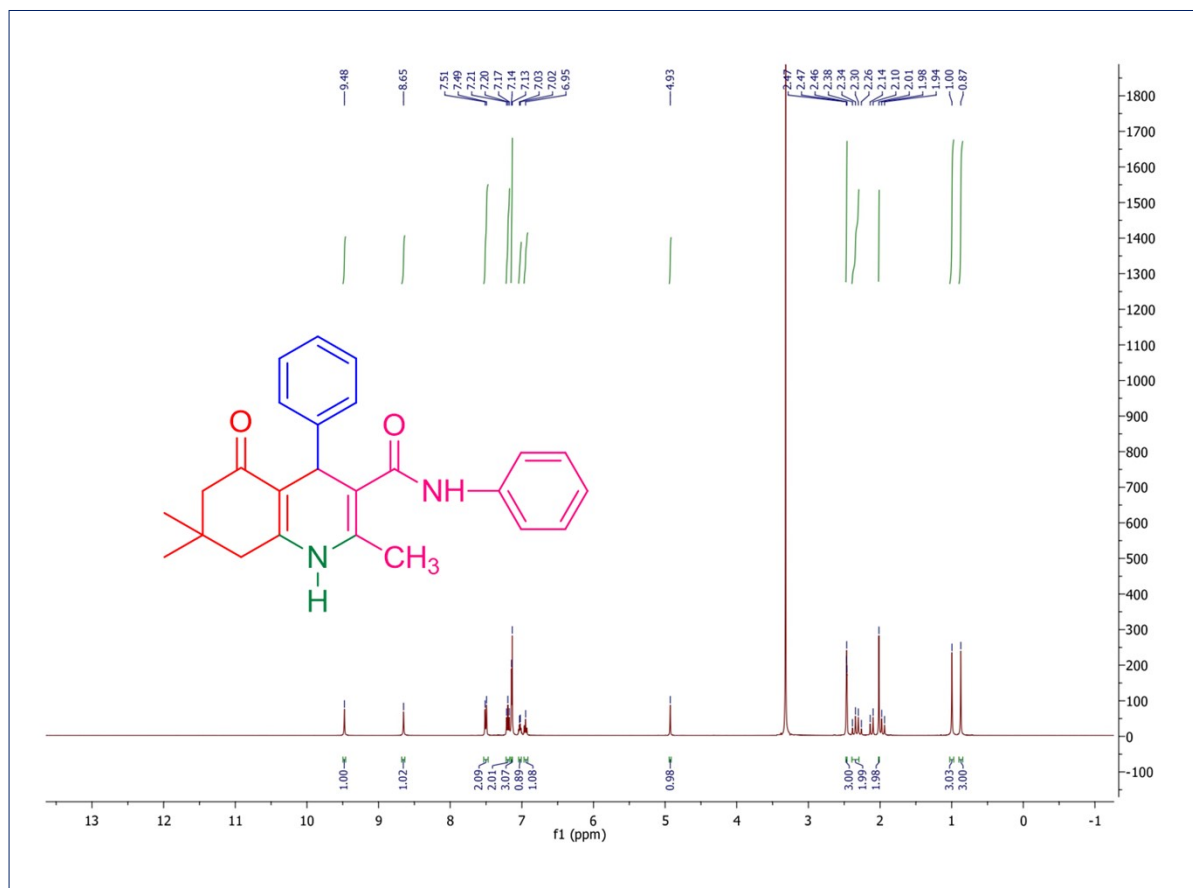

**Spectrum 1 :**  $^1\text{H}$  NMR Spectrum of 4-(phenyl)-2,7,7-trimethyl-5-oxo-N-phenyl-1,4,5,6,7,8-hexahydroquinoline-3-carboxamide (5a)

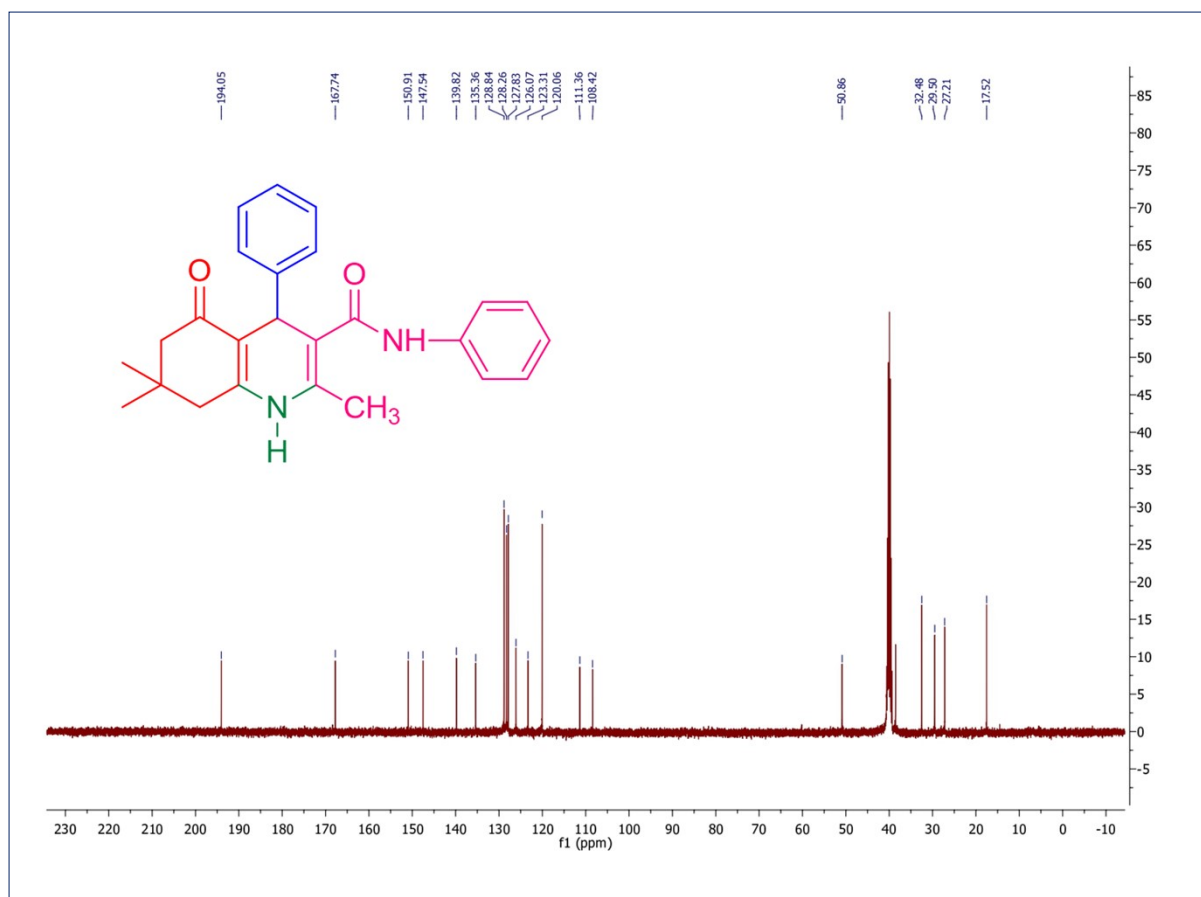

**Spectrum 2 :** <sup>13</sup>C NMR Spectrum of 4-(phenyl)-2,7,7-trimethyl-5-oxo-N-phenyl-1,4,5,6,7,8-hexahydroquinoline -3-carboxamide (5a)

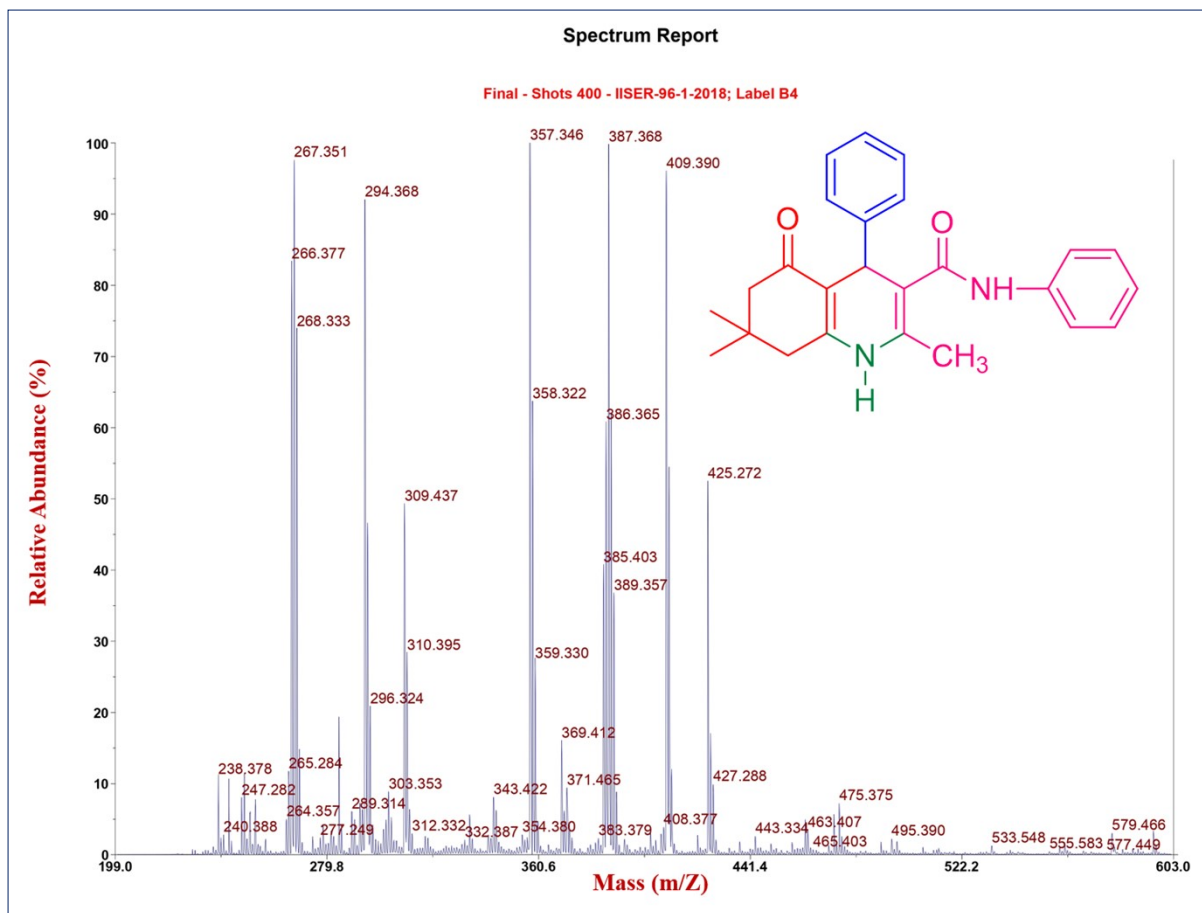

**Spectrum 3** : Mass Spectrum of 4-(phenyl)-2,7,7-trimethyl-5-oxo-N-phenyl-1,4,5,6,7,8-hexahydroquinoline -3-carboxamide (5a)

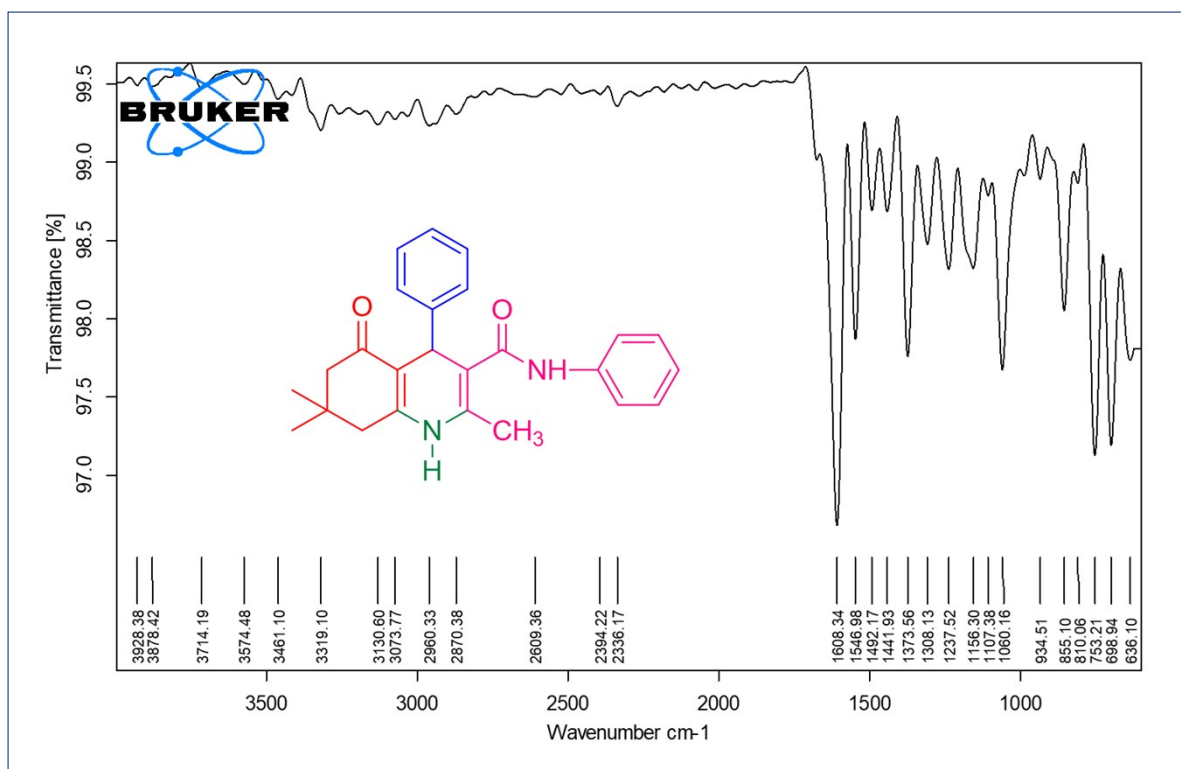

**Spectrum 4** : FTIR Spectrum of 4-(phenyl)-2,7,7-trimethyl-5-oxo-N-phenyl-1,4,5,6,7,8-hexahydroquinoline-3-carboxamide (5a)



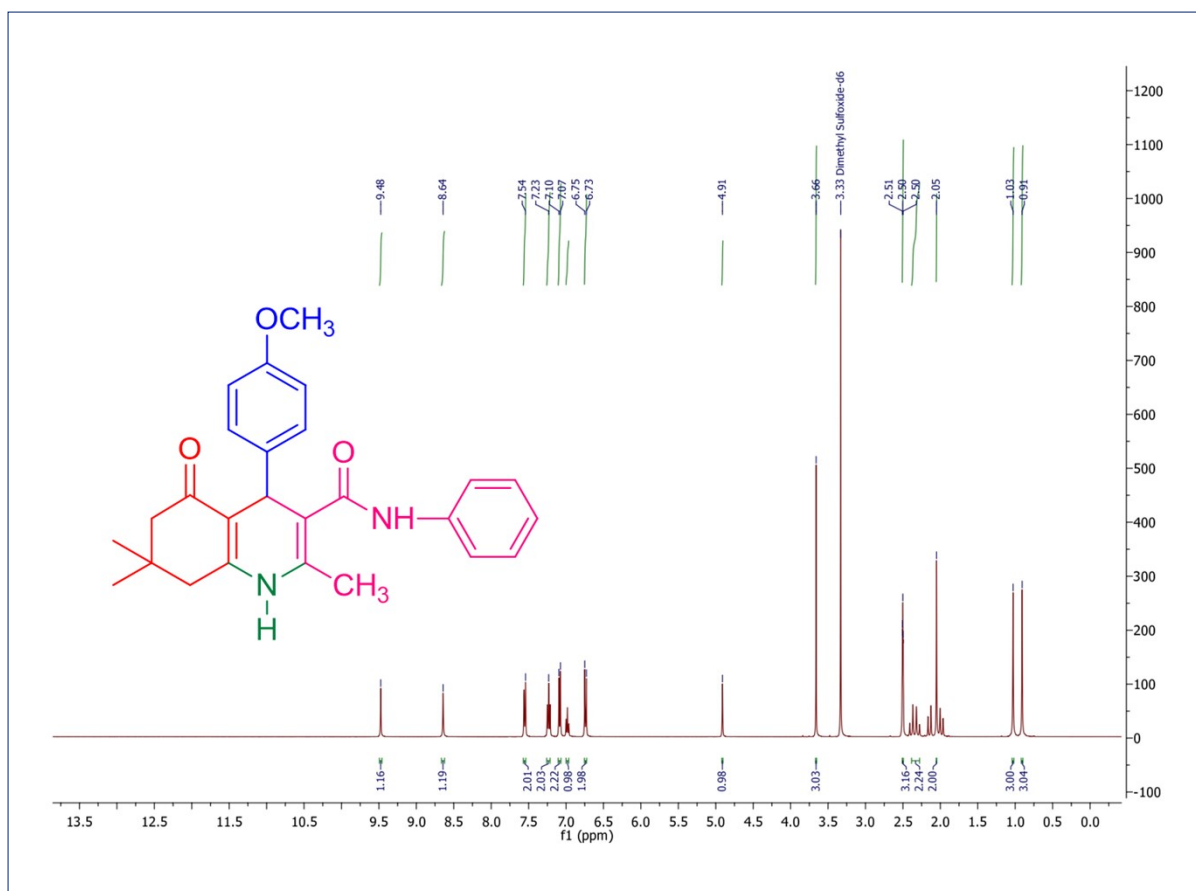

**Spectrum 5 :** <sup>1</sup>H NMR Spectrum of 4-(4-methoxyphenyl)-2,7,7-trimethyl-5-oxo-N-phenyl-1,4,5,6,7,8-hexahydroquinoline-3-carboxamide (5b)

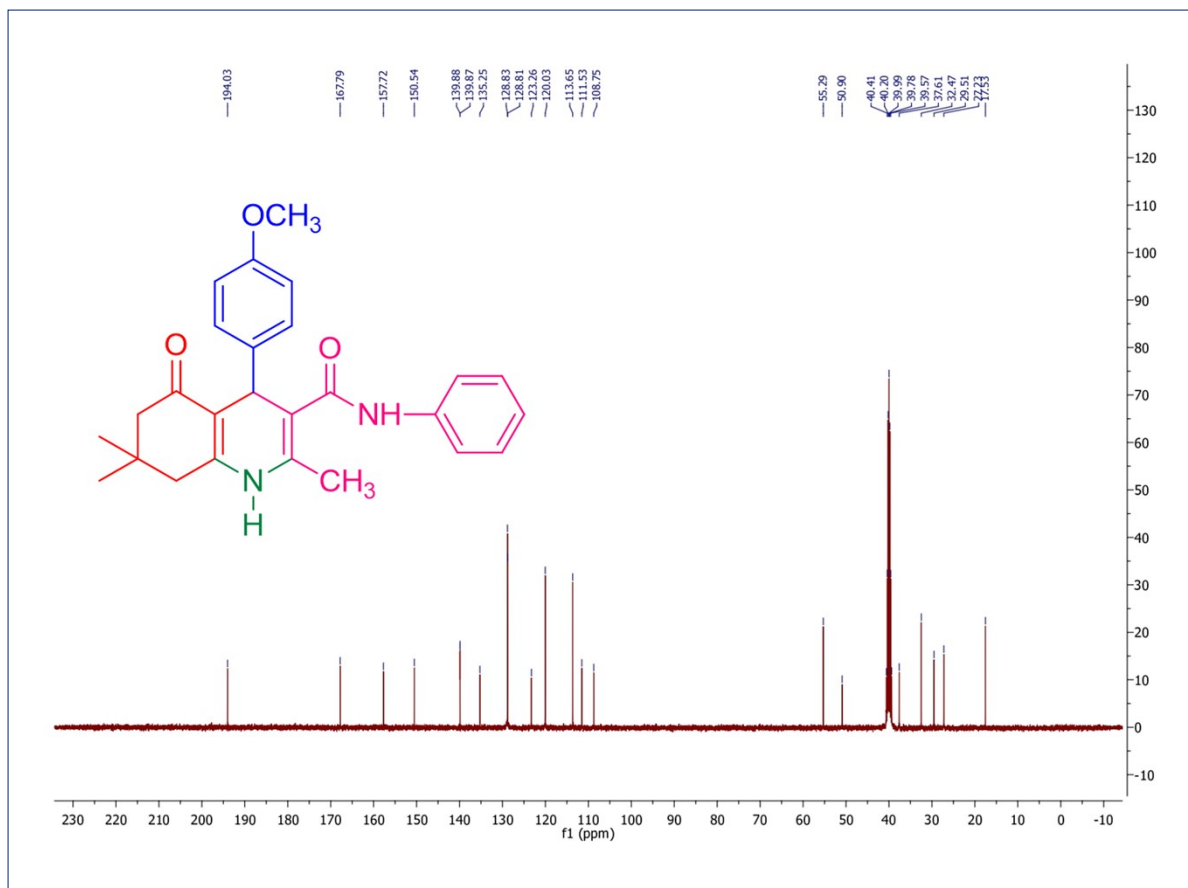

**Spectrum 6 :** <sup>13</sup>C NMR Spectrum of 4-(4-methoxyphenyl)-2,7,7-trimethyl-5-oxo-N-phenyl-1,4,5,6,7,8-hexahydroquinoline-3-carboxamide (5b)

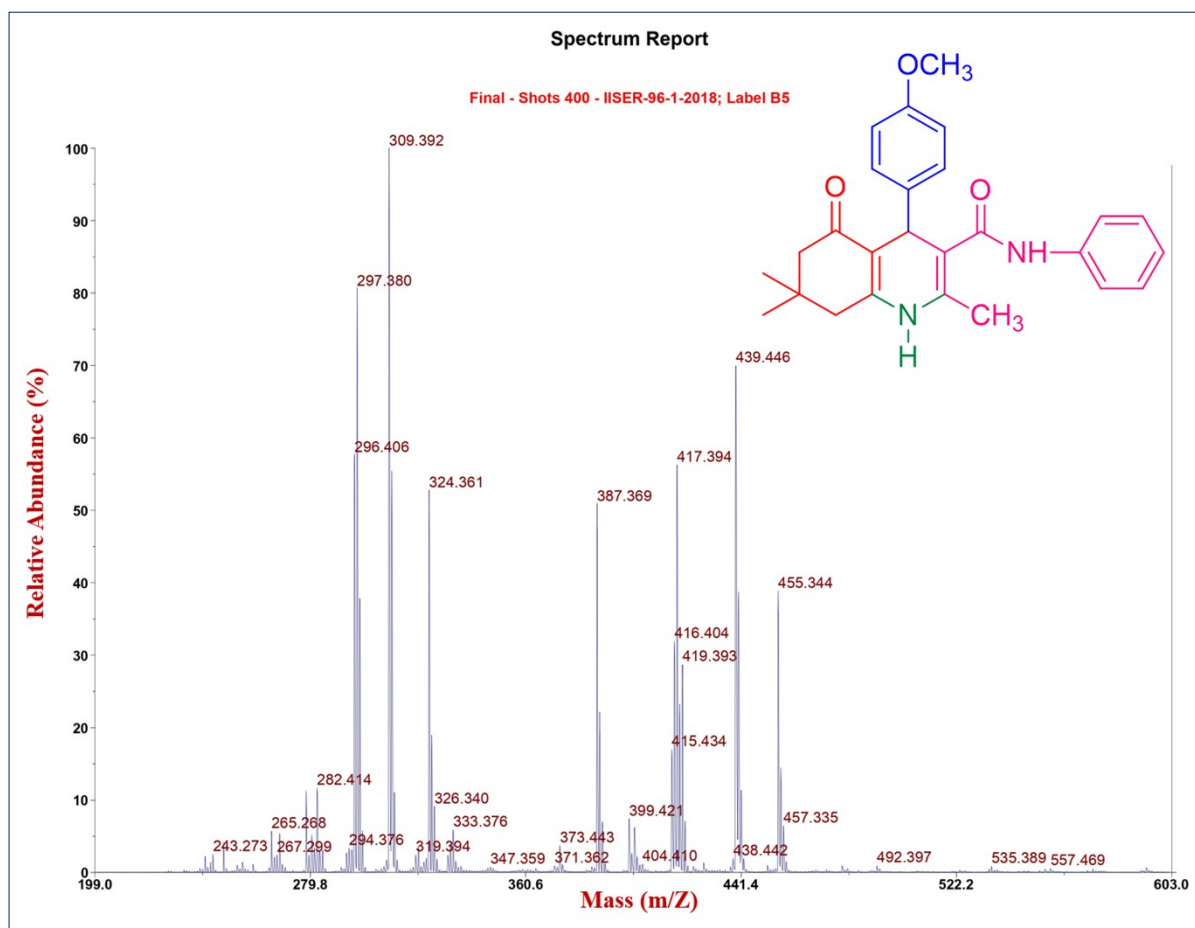

**Spectrum 7** : Mass Spectrum of 4-(4-methoxyphenyl)-2,7,7-trimethyl-5-oxo-N-phenyl-1,4,5,6,7,8-hexahydroquinoline -3-carboxamide (5b)

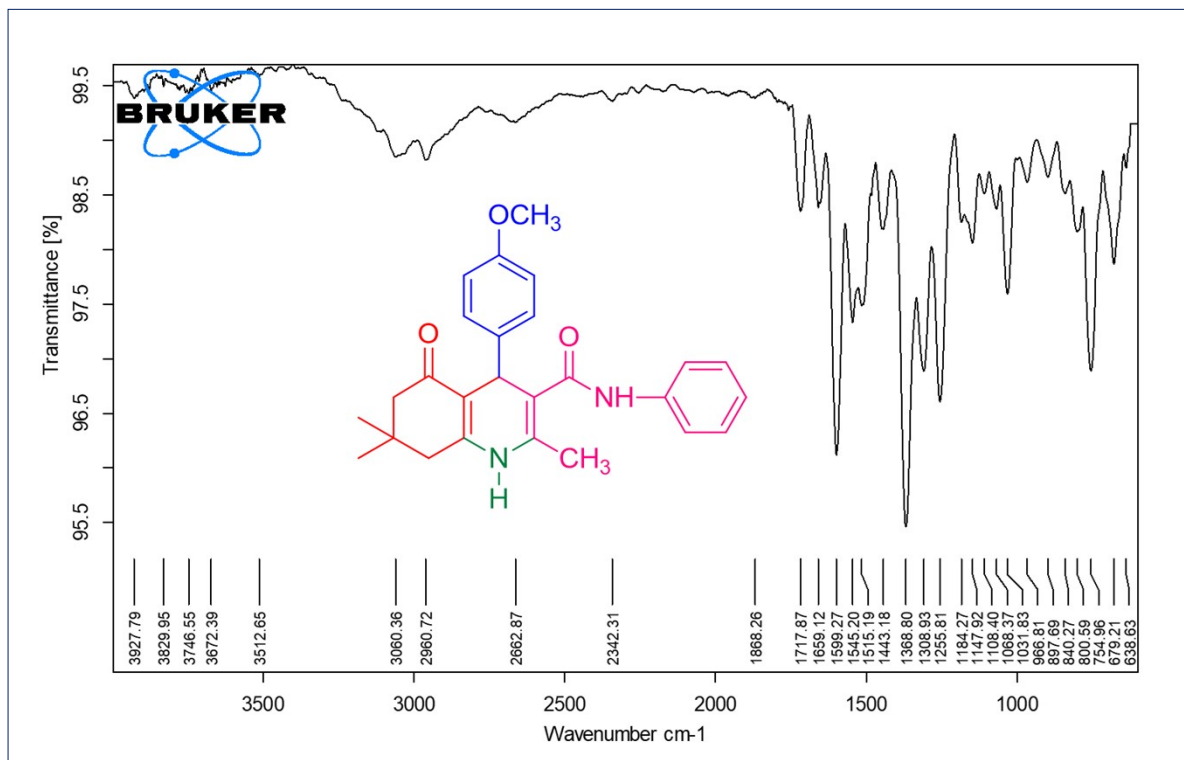

**Spectrum 8** : FTIR Spectrum of 4-(4-methoxyphenyl)-2,7,7-trimethyl-5-oxo-N-phenyl-1,4,5,6,7,8-hexahydroquinoline-3-carboxamide (5b)

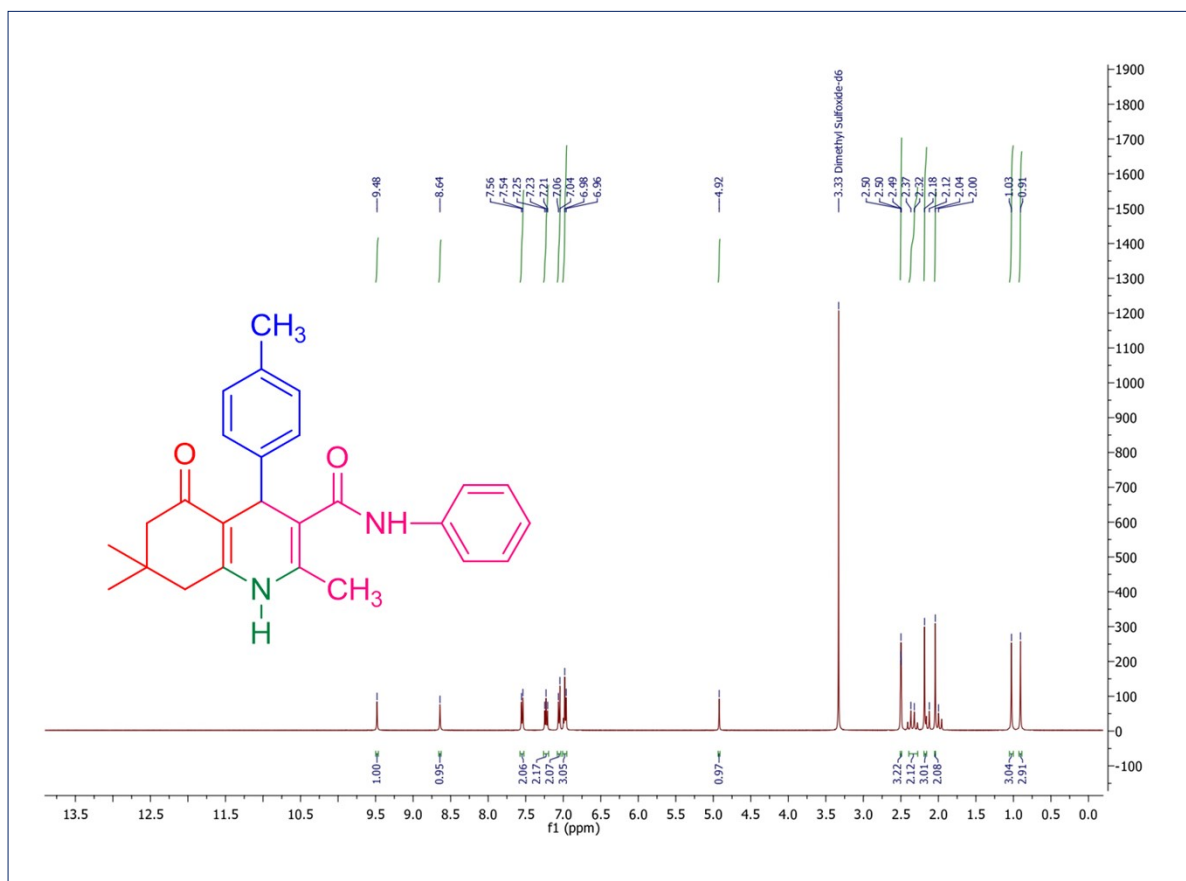

**Spectrum 9** :  $^1\text{H}$  Spectrum of 4-(4-methylphenyl)-2,7,7-trimethyl-5-oxo-N-phenyl-1,4,5,6,7,8-hexahydroquinoline-3-carboxamide (5c)

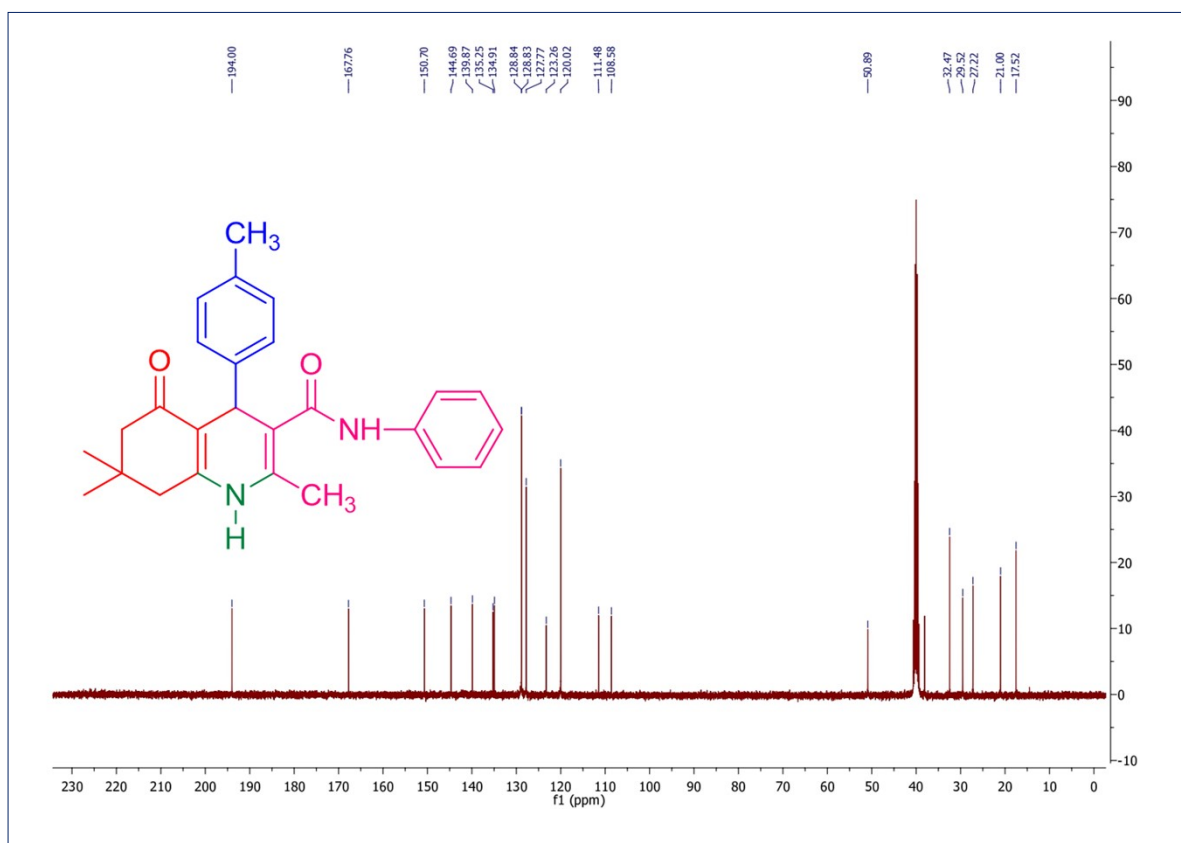

**Spectrum 10 :** <sup>13</sup>C Spectrum of 4-(4-methylphenyl)-2,7,7-trimethyl-5-oxo-N-phenyl-1,4,5,6,7,8-hexahydroquinoline -3-carboxamide (5c)

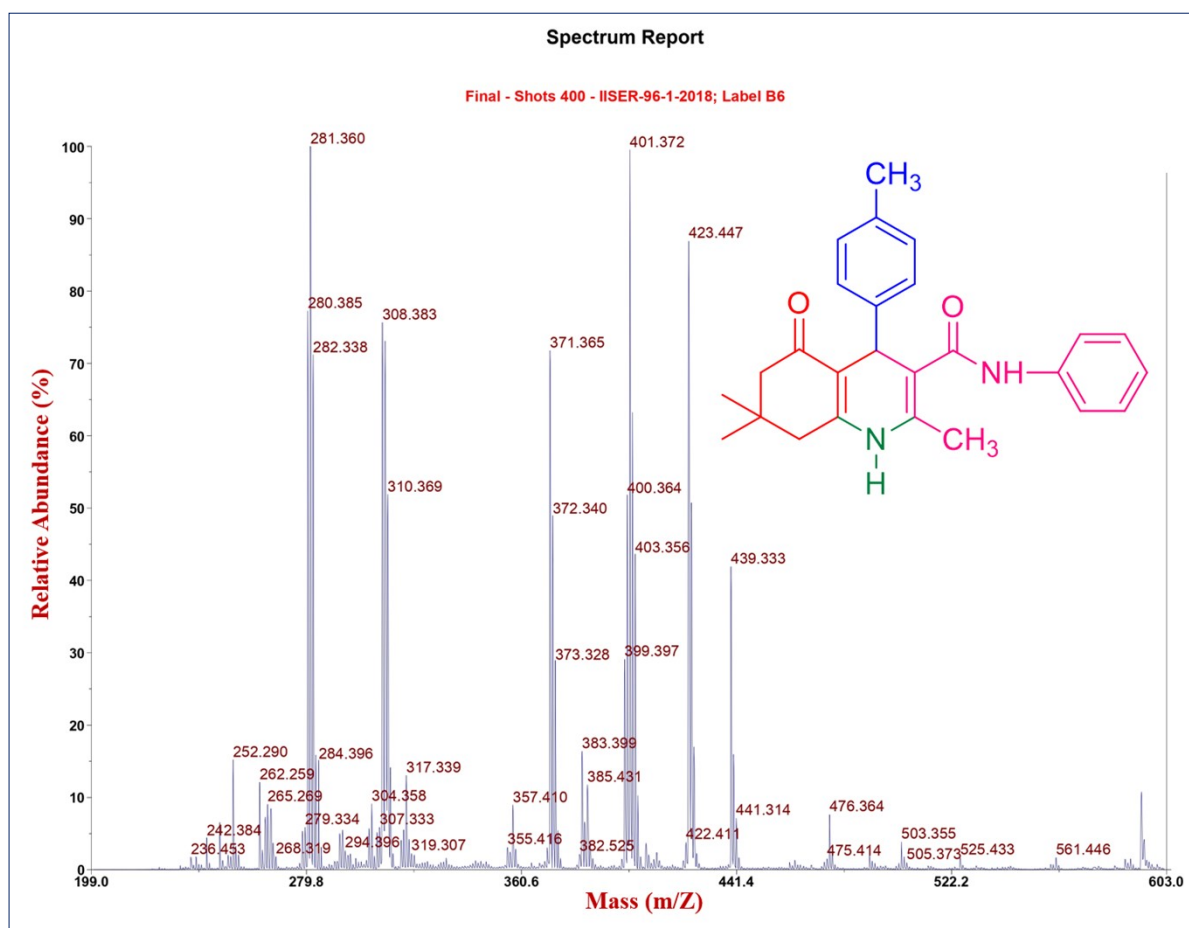

**Spectrum 11** : Mass Spectrum of 4-(4-methylphenyl)-2,7,7-trimethyl-5-oxo-N-phenyl-1,4,5,6,7,8-hexahydroquinoline -3-carboxamide (5c)

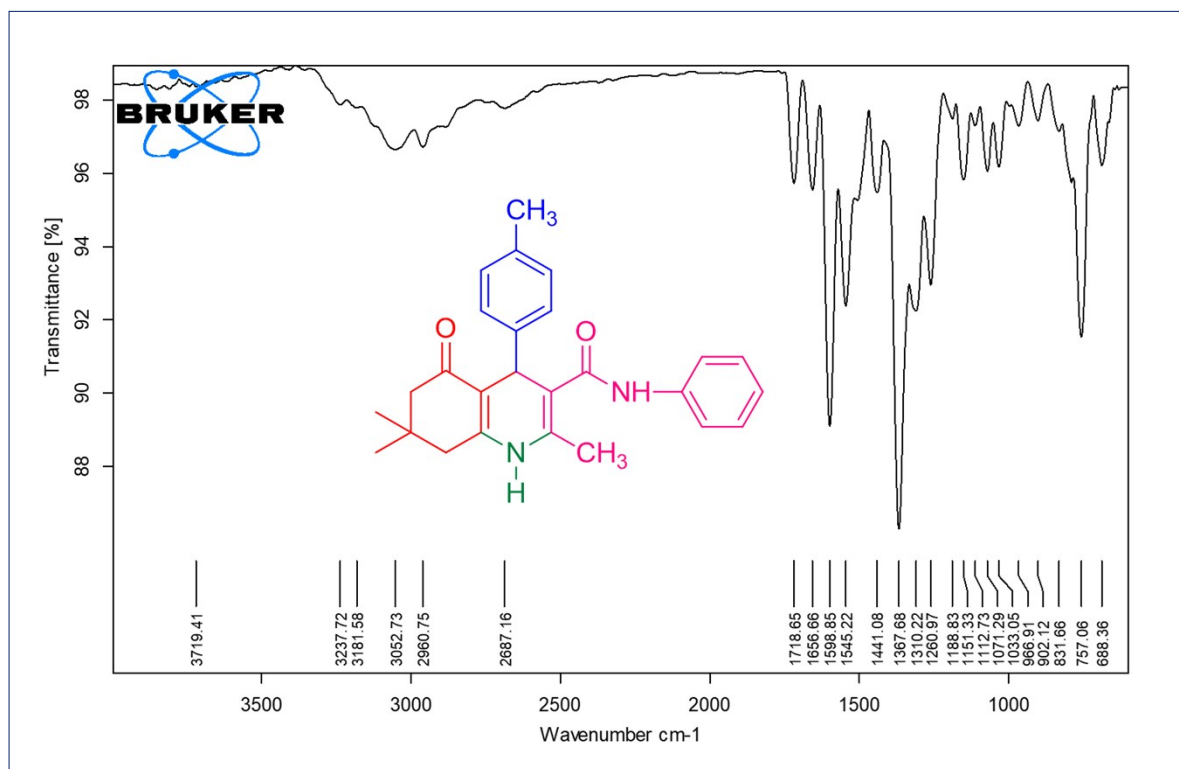

**Spectrum 12 :** FTIR Spectrum of 4-(4-methylphenyl)-2,7,7-trimethyl-5-oxo-N-phenyl-1,4,5,6,7,8-hexahydroquinoline -3-carboxamide (5c)



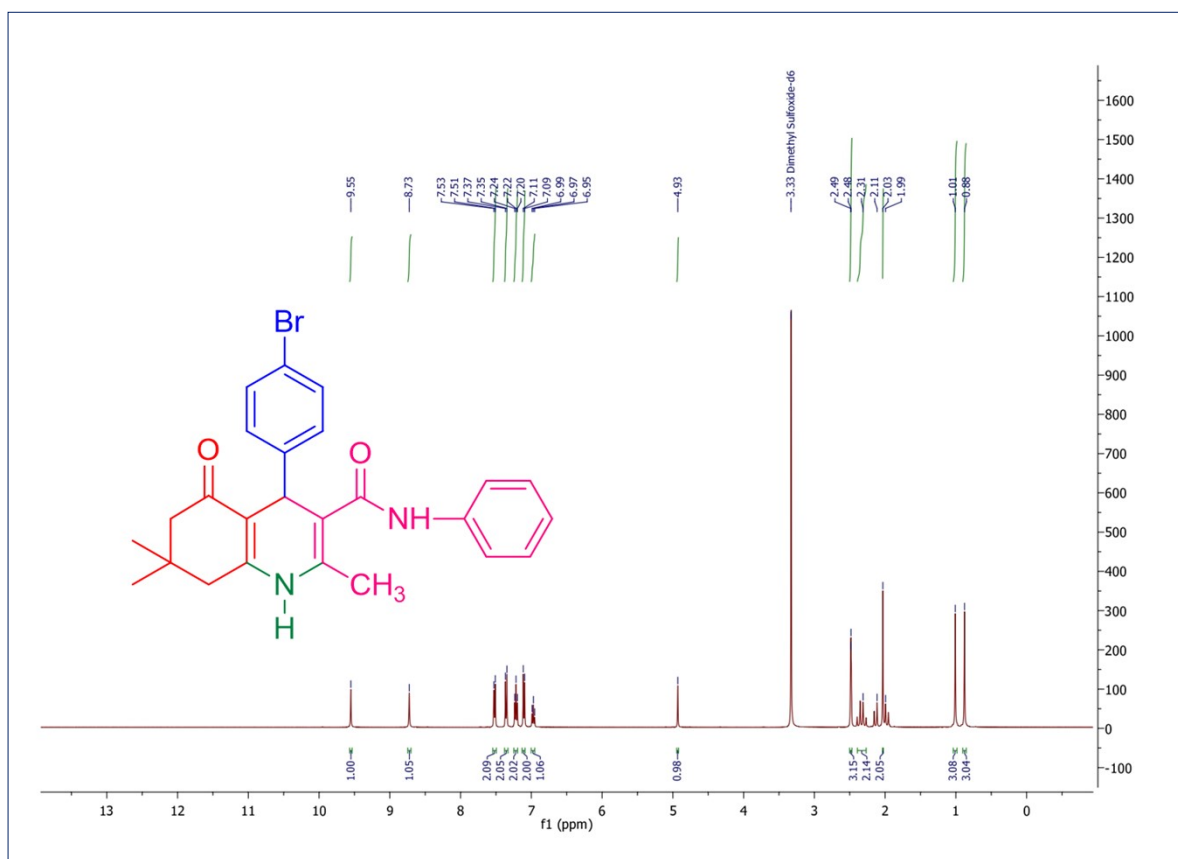

**Spectrum 13 :** <sup>1</sup>H Spectrum of 4-(4-bromophenyl)-2,7,7-trimethyl-5-oxo-N-phenyl-1,4,5,6,7,8-hexahydroquinoline-3-carboxamide (5d)

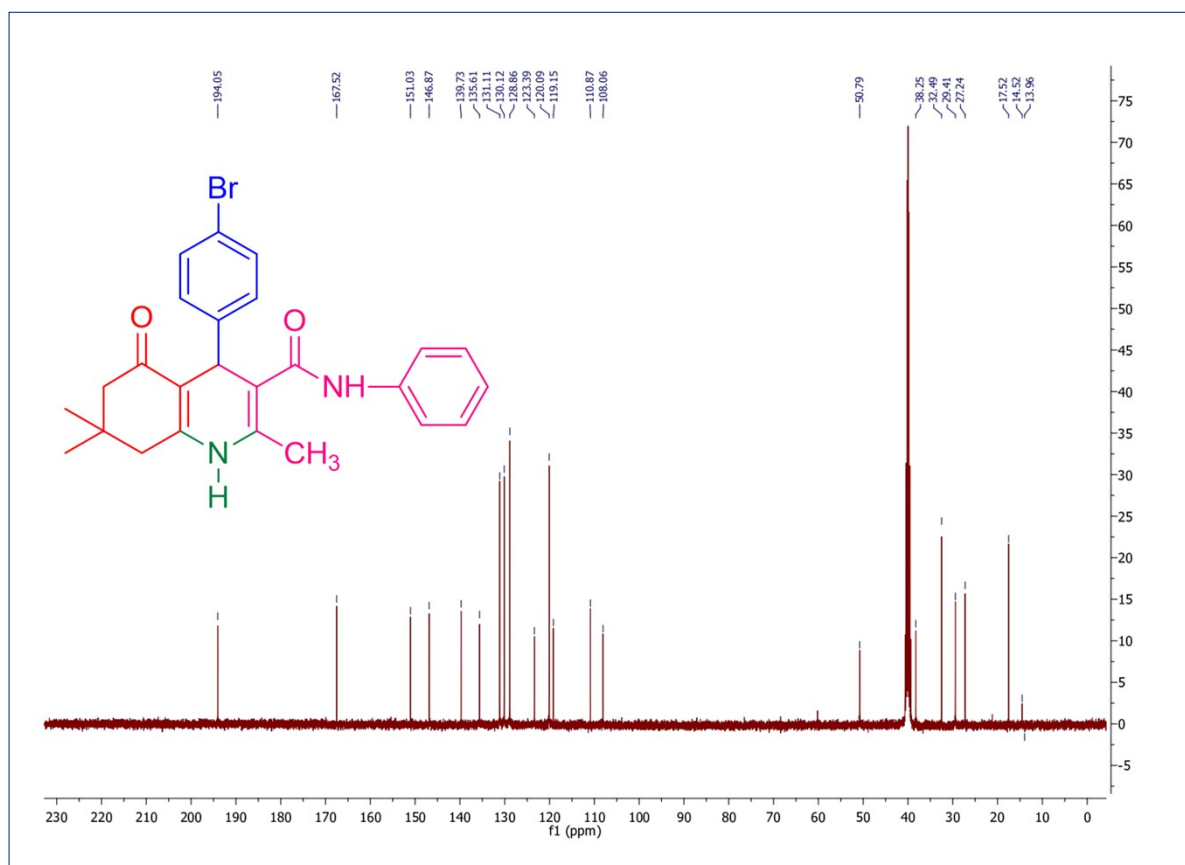

**Spectrum 14 :** <sup>13</sup>C Spectrum of 4-(4-bromophenyl)-2,7,7-trimethyl-5-oxo-N-phenyl-1,4,5,6,7,8-hexahydroquinoline -3-carboxamide (5d)

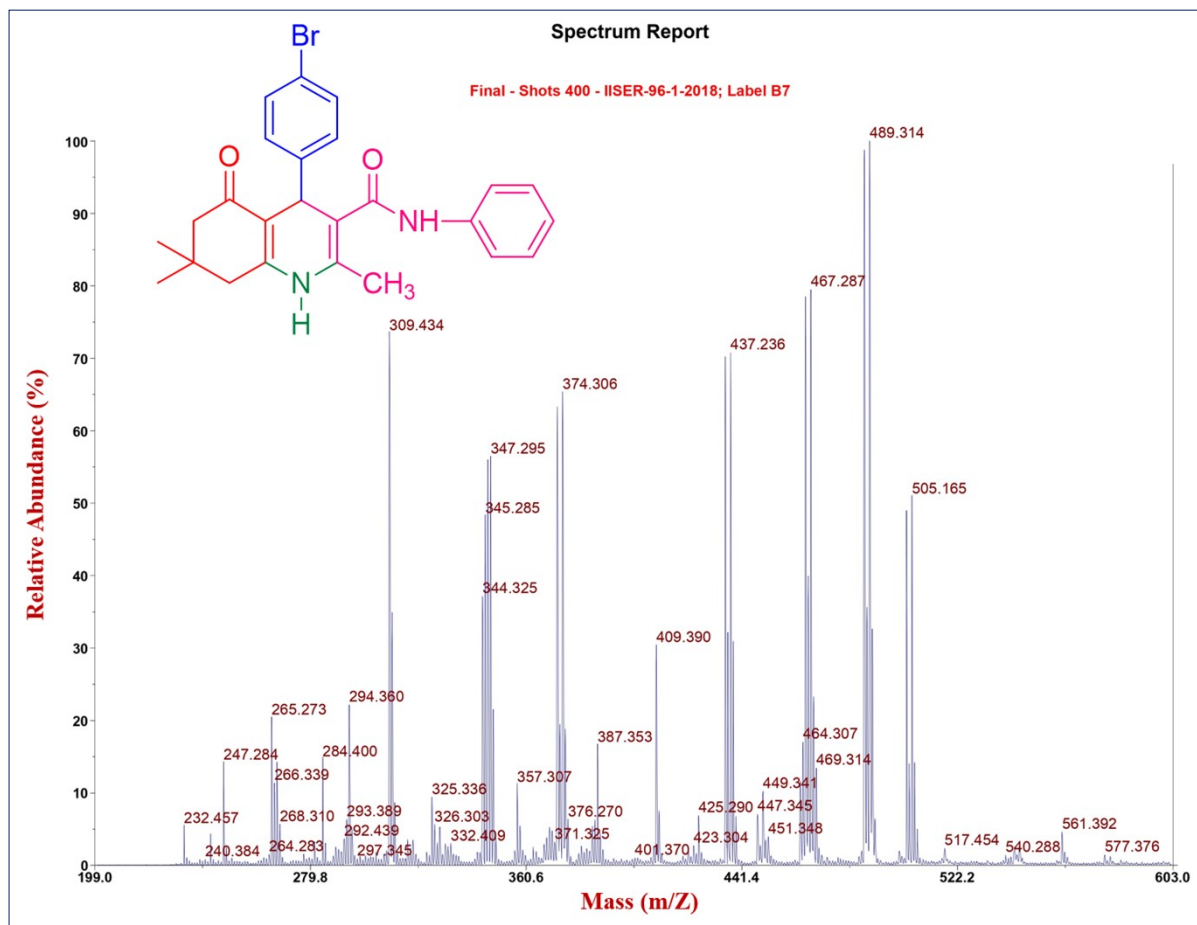

**Spectrum 15 :** Mass Spectrum of 4-(4-bromophenyl)-2,7,7-trimethyl-5-oxo-N-phenyl-1,4,5,6,7,8-hexahydroquinoline-3-carboxamide (5d)

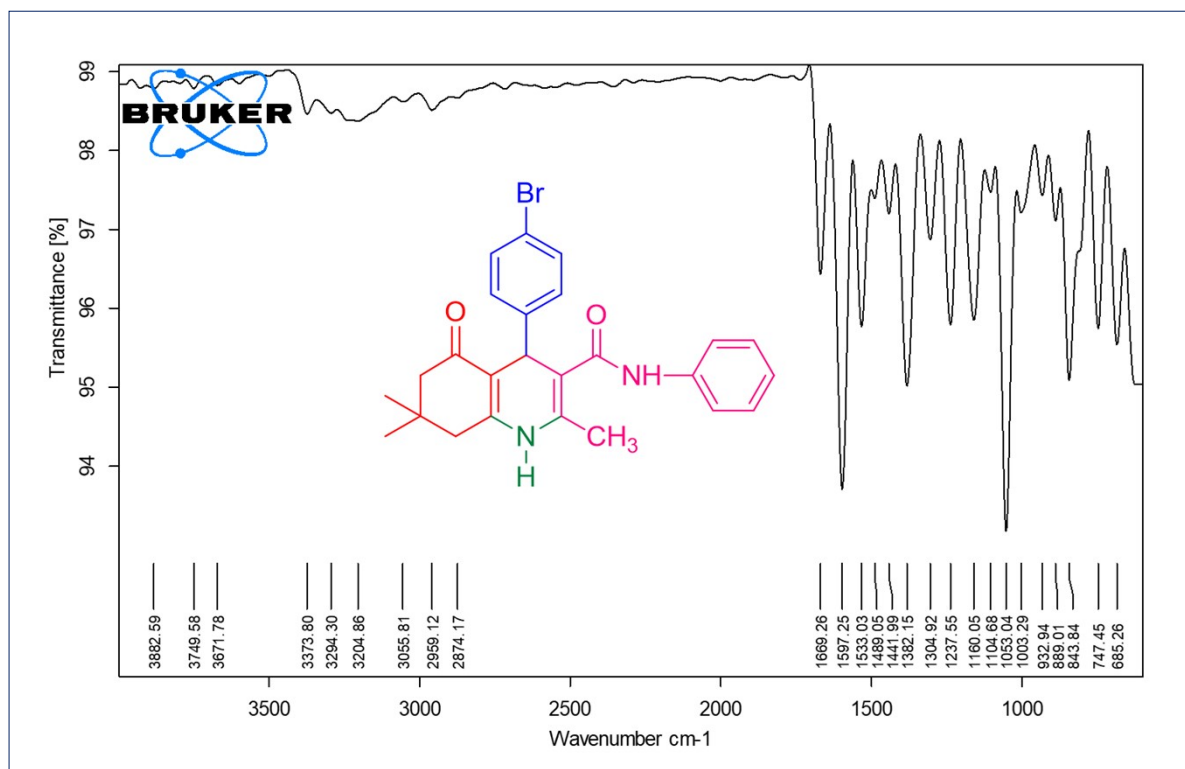

**Spectrum 16 :** FTIR Spectrum of 4-(4-bromophenyl)-2,7,7-trimethyl-5-oxo-N-phenyl-1,4,5,6,7,8-hexahydroquinoline -3-carboxamide (5d)

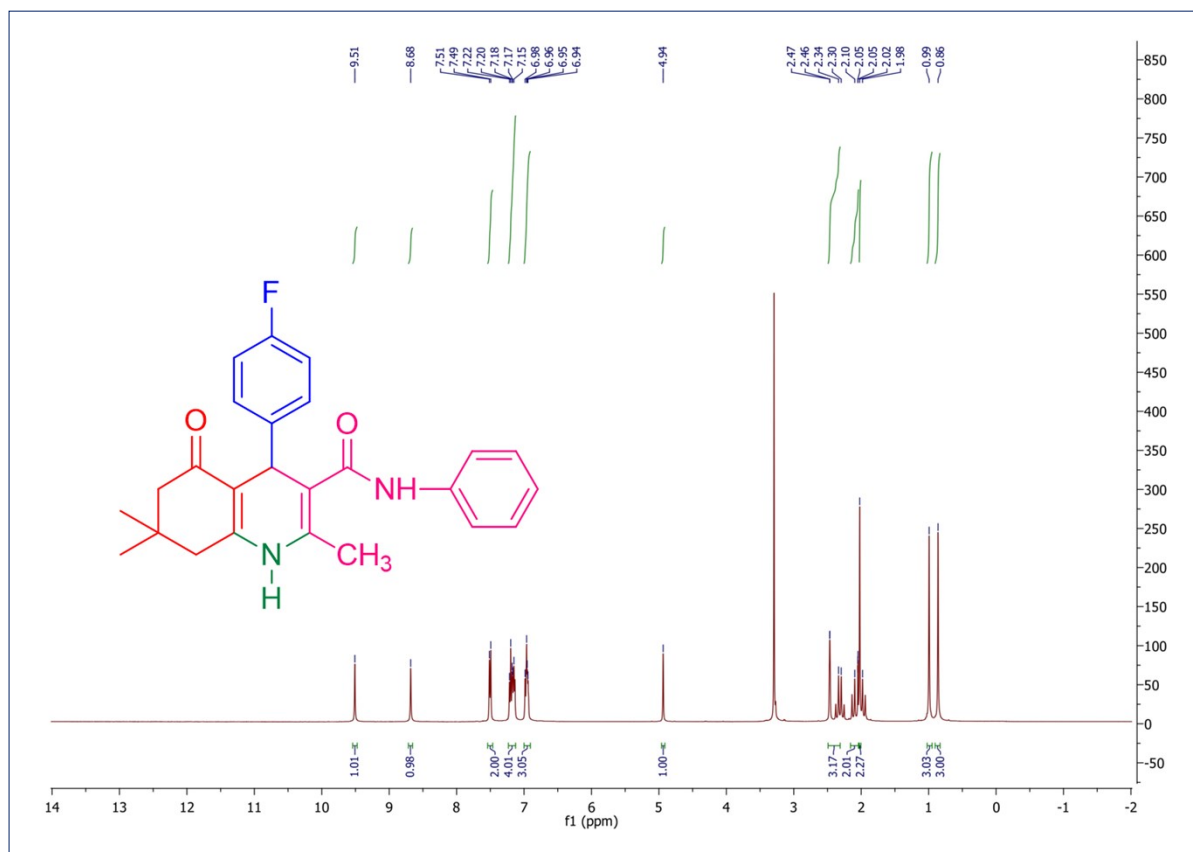

**Spectrum 17 :** <sup>1</sup>H Spectrum of 4-(4-fluorophenyl)-2,7,7-trimethyl-5-oxo-N-phenyl-1,4,5,6,7,8-hexahydroquinoline-3-carboxamide (5e)

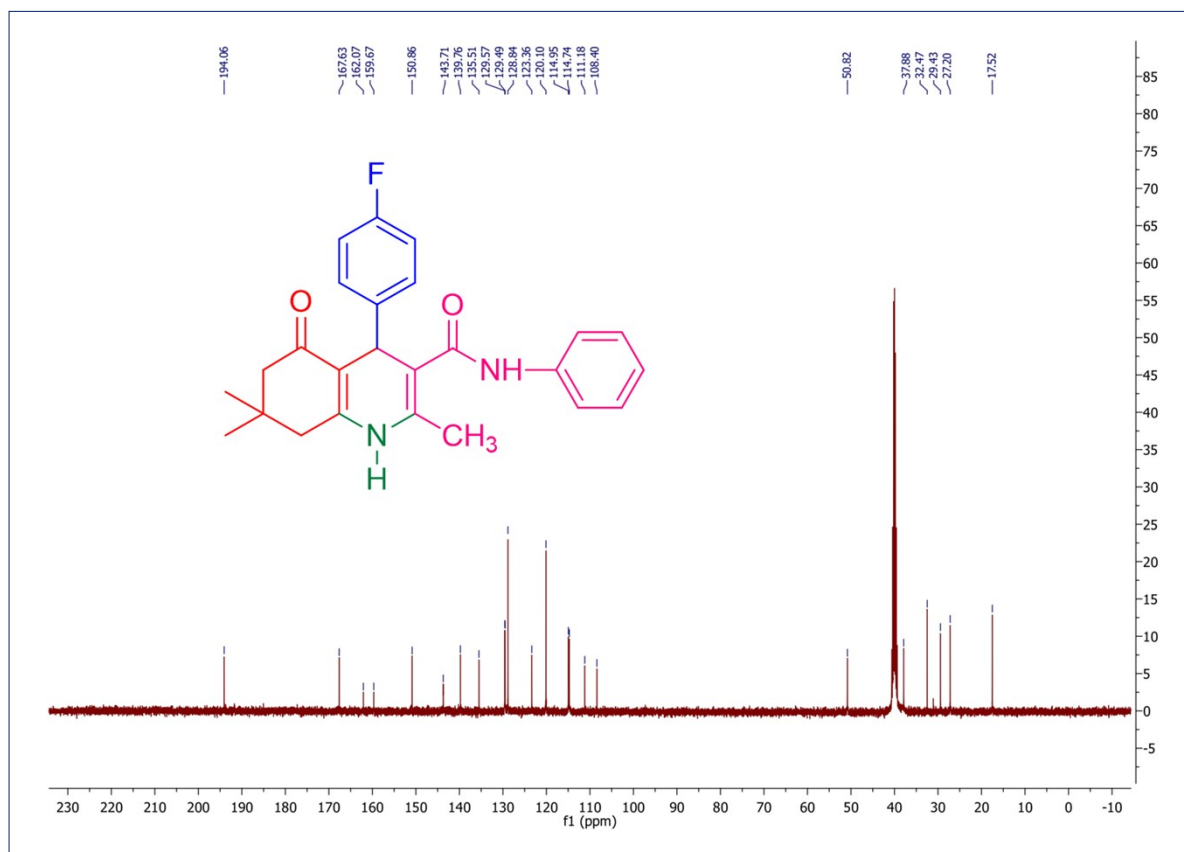

**Spectrum 18 :**  $^{13}\text{C}$  Spectrum of 4-(4-fluorophenyl)-2,7,7-trimethyl-5-oxo-N-phenyl-1,4,5,6,7,8-hexahydroquinoline-3-carboxamide (5e)

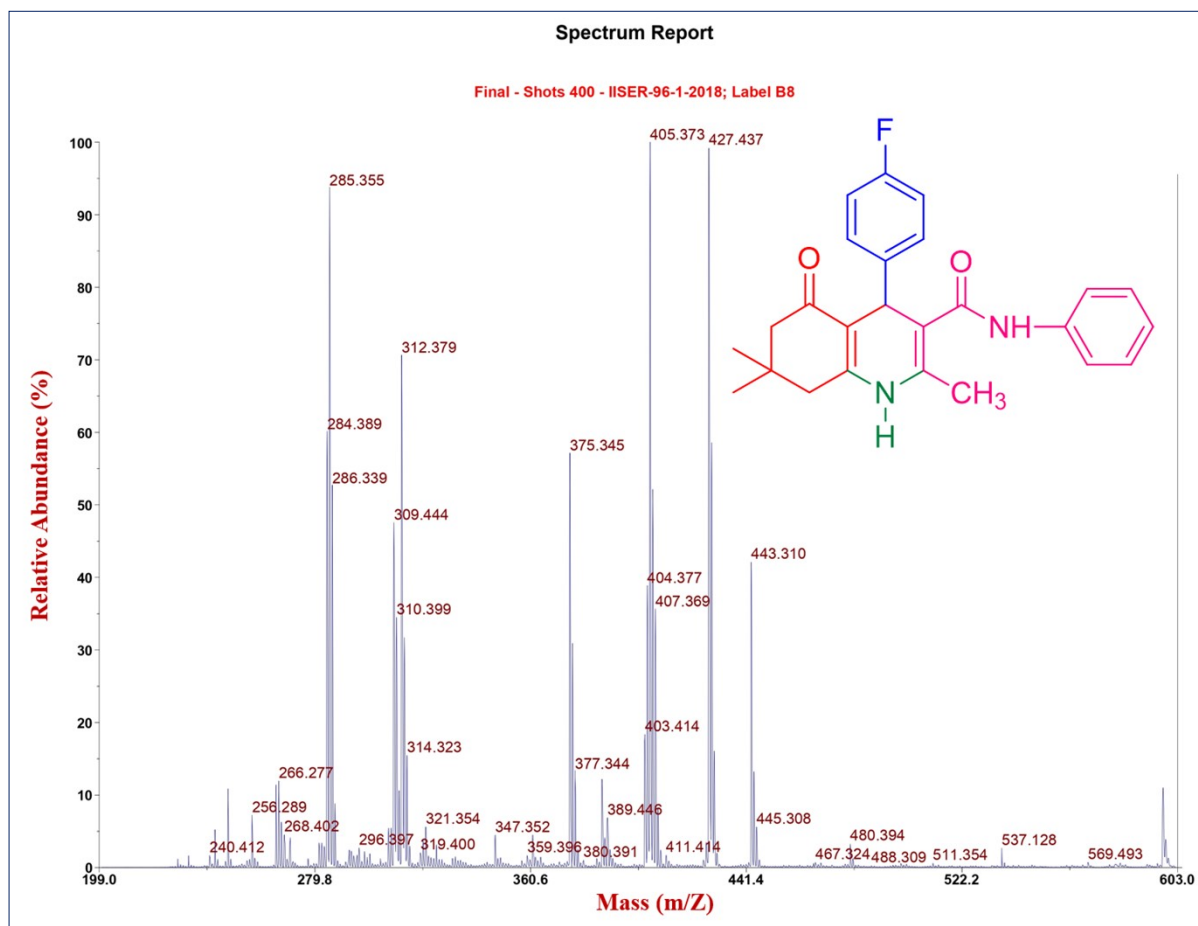

**Spectrum 19** : Mass Spectrum of 4-(4-fluorophenyl)-2,7,7-trimethyl-5-oxo-N-phenyl-1,4,5,6,7,8-hexahydroquinoline -3-carboxamide (5e)

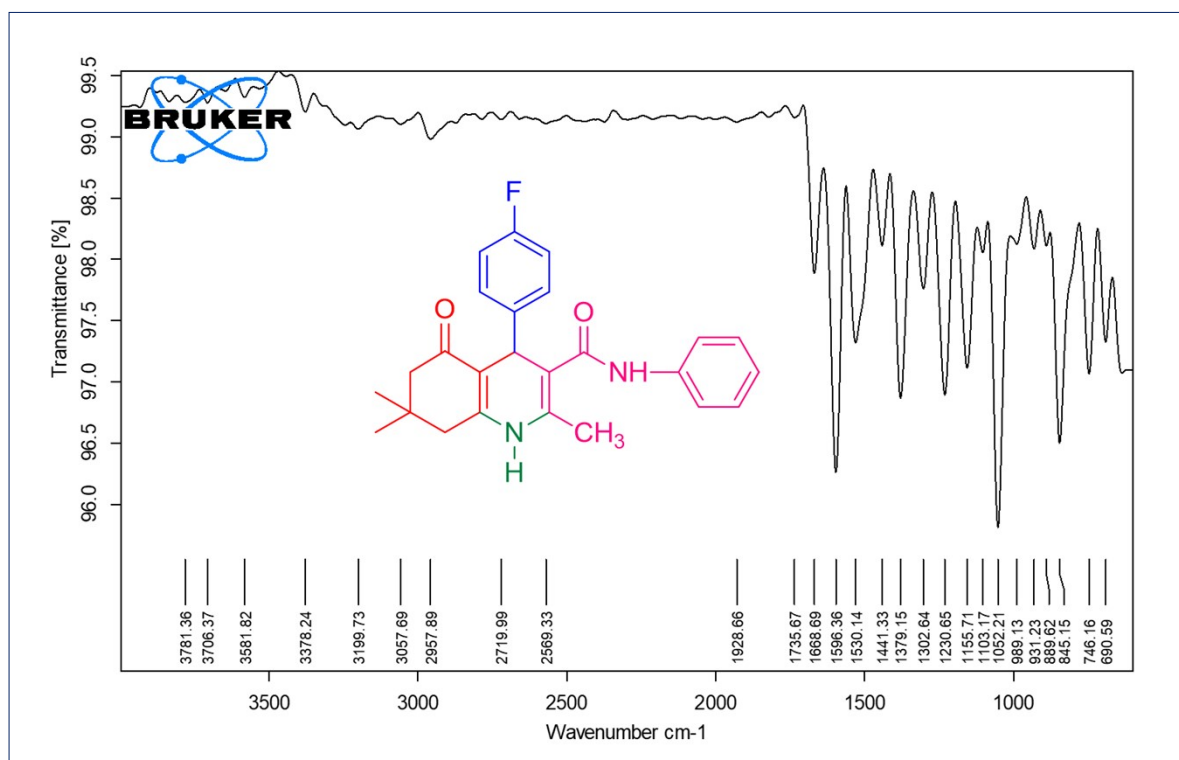

**Spectrum 20** : FTIR Spectrum of 4-(4-fluorophenyl)-2,7,7-trimethyl-5-oxo-N-phenyl-1,4,5,6,7,8-hexahydroquinoline-3-carboxamide (5e)



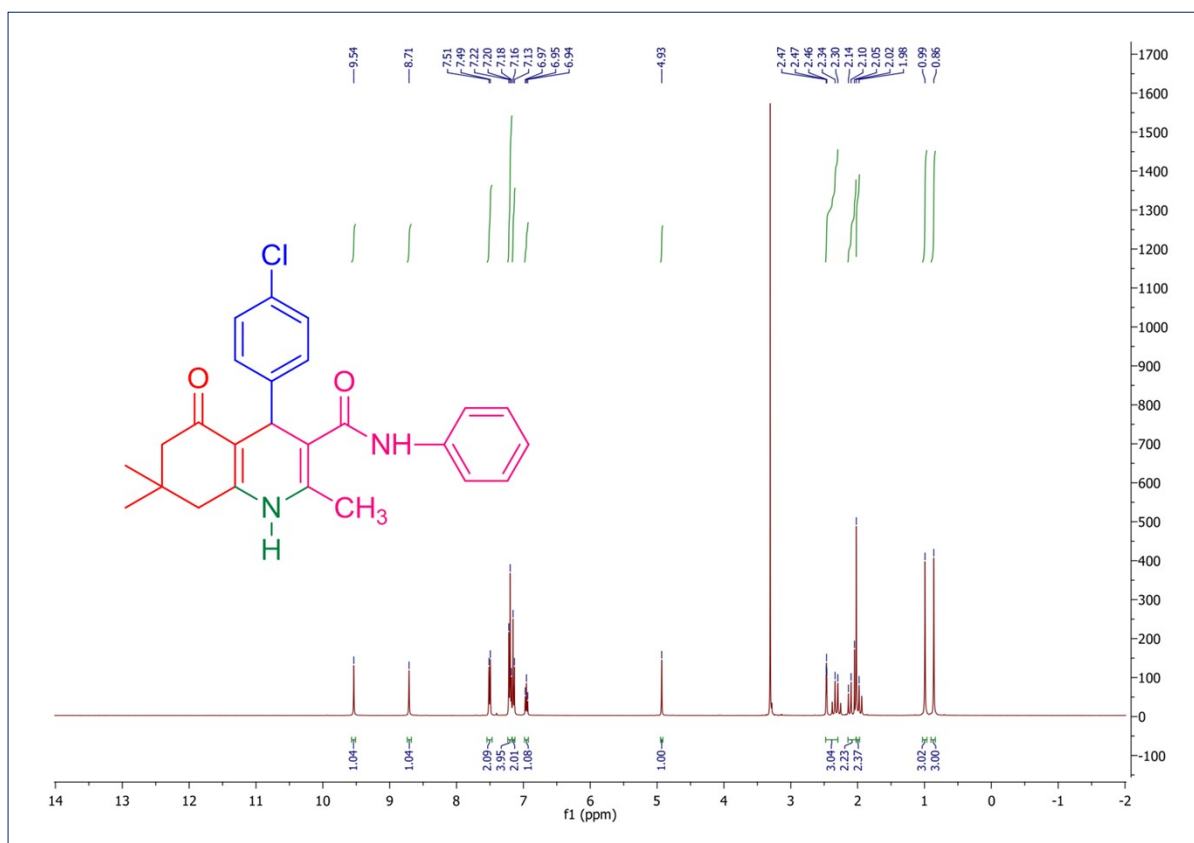

**Spectrum 21** : <sup>1</sup>H Spectrum of 4-(4-chlorophenyl)-2,7,7-trimethyl-5-oxo-N-phenyl-1,4,5,6,7,8-hexahydroquinoline-3-carboxamide (5f)

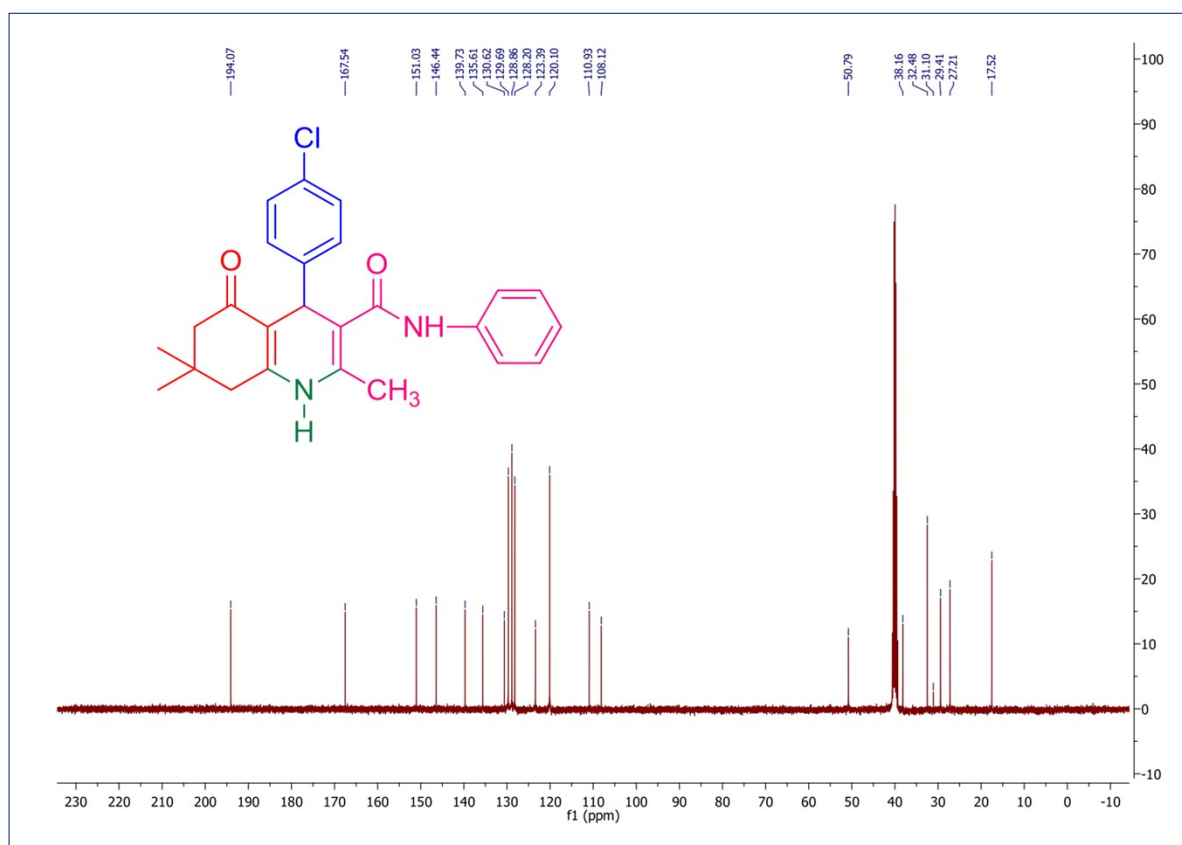

**Spectrum 22 :**  $^{13}\text{C}$  Spectrum of 4-(4-chlorophenyl)-2,7,7-trimethyl-5-oxo-N-phenyl-1,4,5,6,7,8-hexahydroquinoline-3-carboxamide (5f)

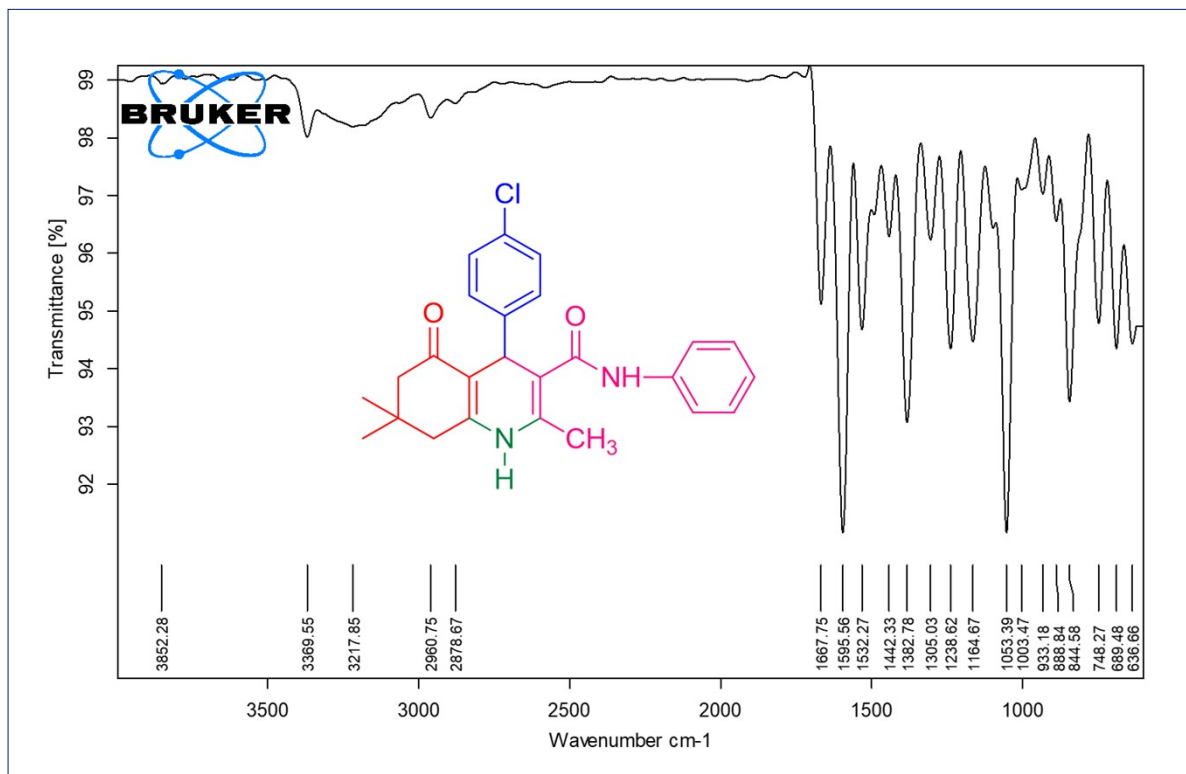

**Spectrum 23** : FTIR Spectrum of 4-(4-chlorophenyl)-2,7,7-trimethyl-5-oxo-N-phenyl-1,4,5,6,7,8-hexahydroquinoline-3-carboxamide (5f)

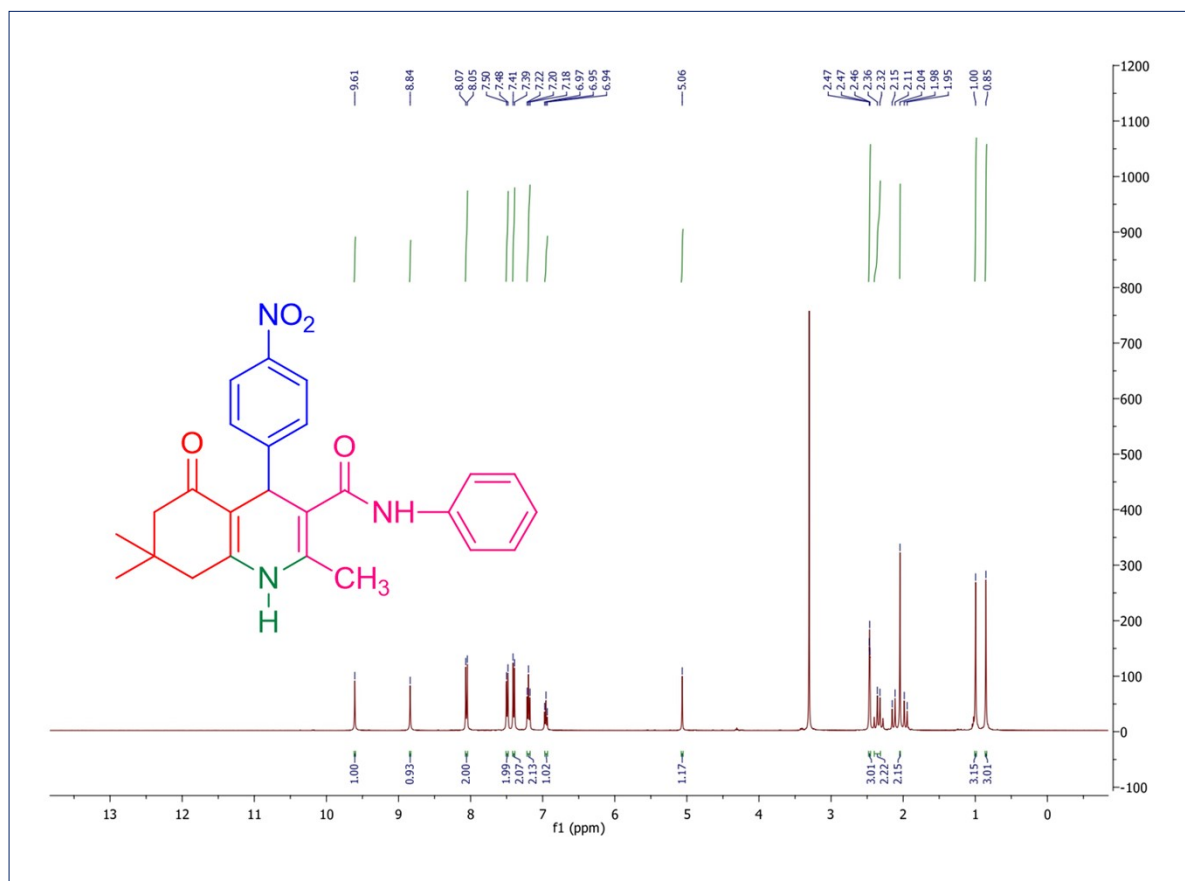

**Spectrum 24 :** <sup>1</sup>H Spectrum of 4-(4-nitrophenyl)-2,7,7-trimethyl-5-oxo-N-phenyl-1,4,5,6,7,8-hexahydroquinoline-3-carboxamide (5g)

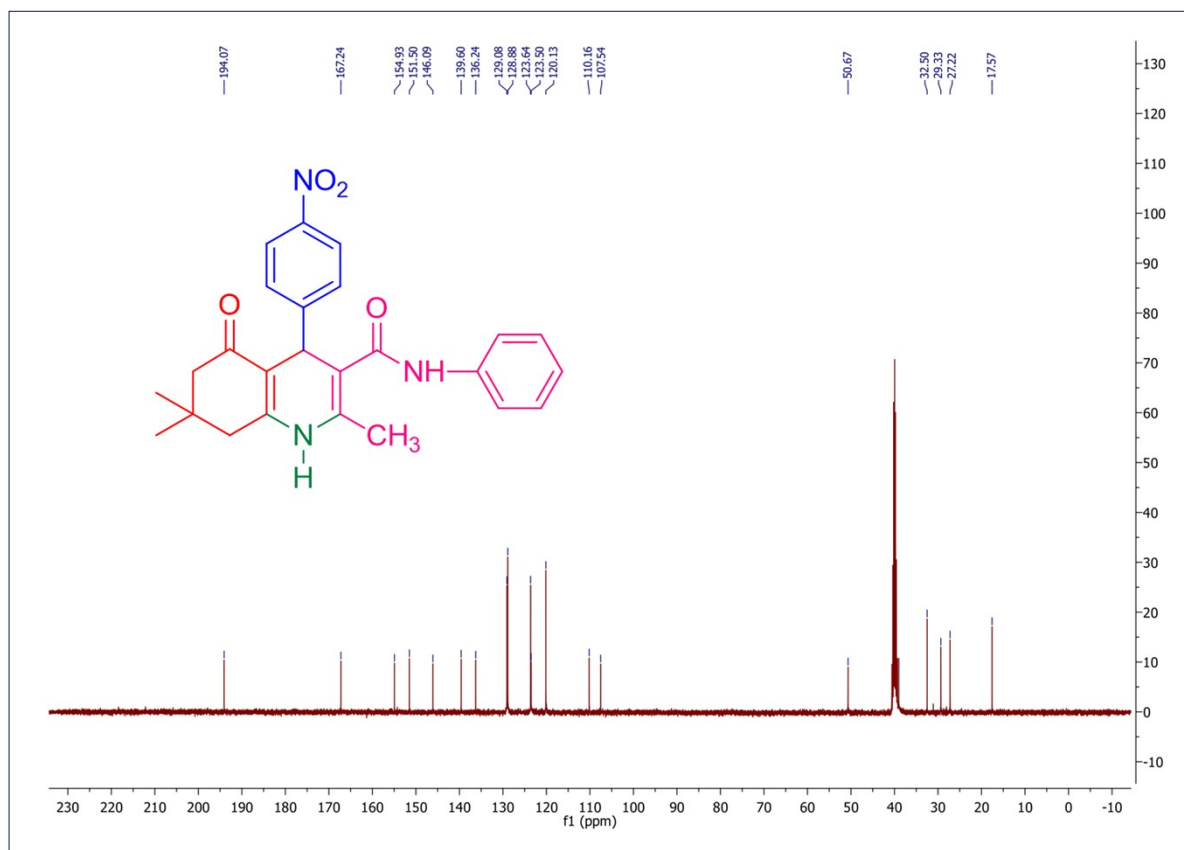

**Spectrum 25 :** <sup>13</sup>C Spectrum of 4-(4-nitrophenyl)-2,7,7-trimethyl-5-oxo-N-phenyl-1,4,5,6,7,8-hexahydroquinoline -3-carboxamide (5g)

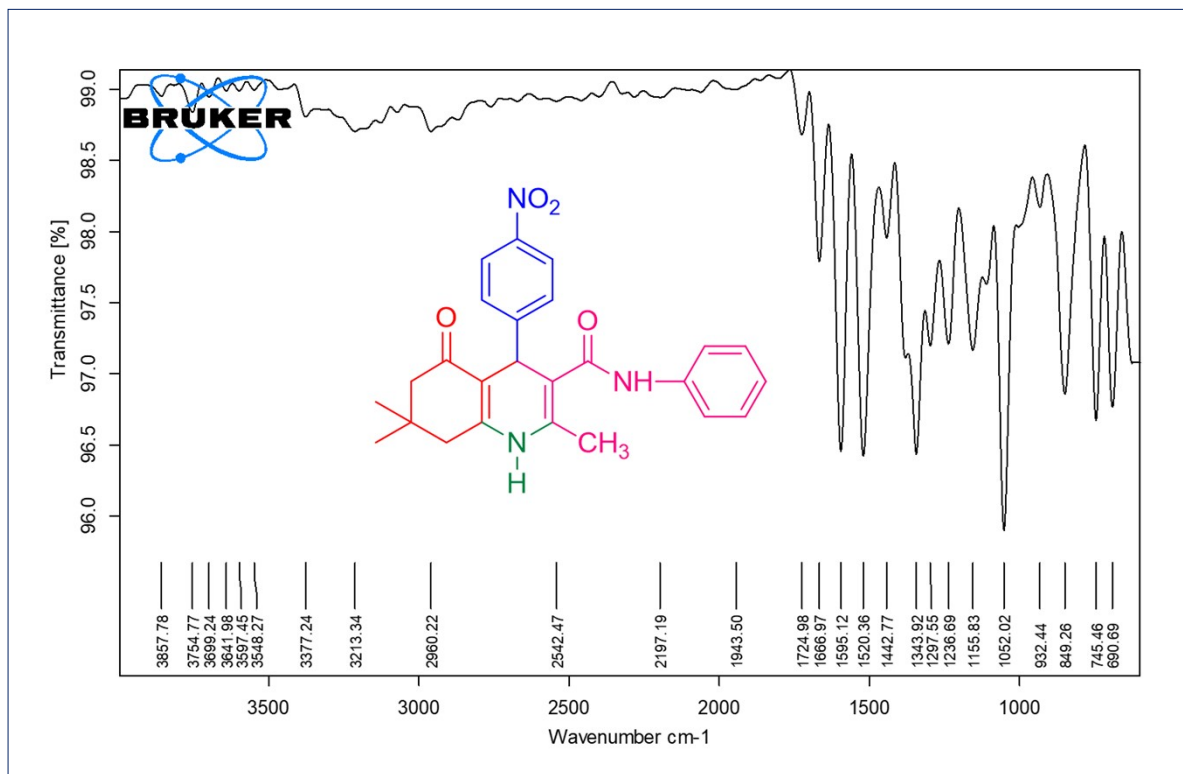

**Spectrum 26 :** FTIR Spectrum of 4-(4-nitrophenyl)-2,7,7-trimethyl-5-oxo-N-phenyl-1,4,5,6,7,8-hexahydroquinoline -3-carboxamide (5g)

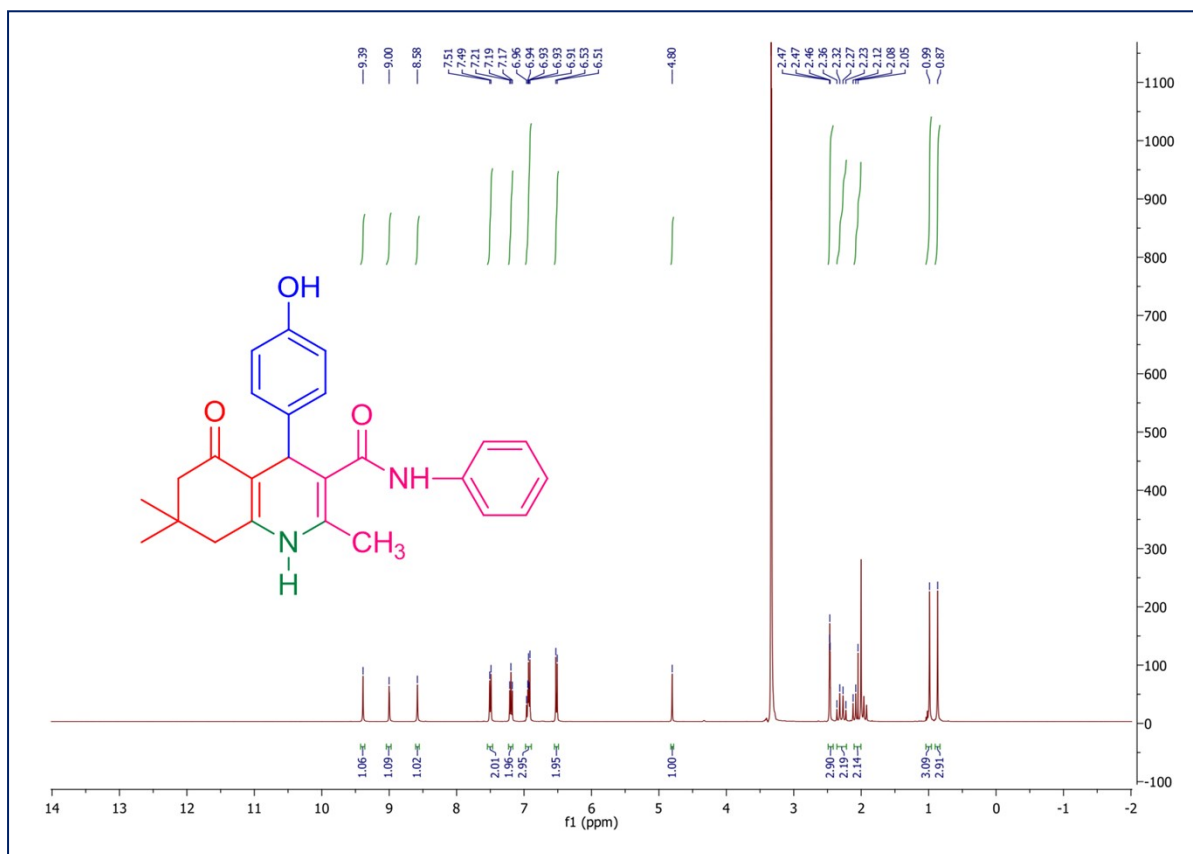

**Spectrum 27 :**  $^1\text{H}$  Spectrum of 4-(4-hydroxyphenyl)-2,7,7-trimethyl-5-oxo-N-phenyl-1,4,5,6,7,8-hexahydroquinoline-3-carboxamide (5h)

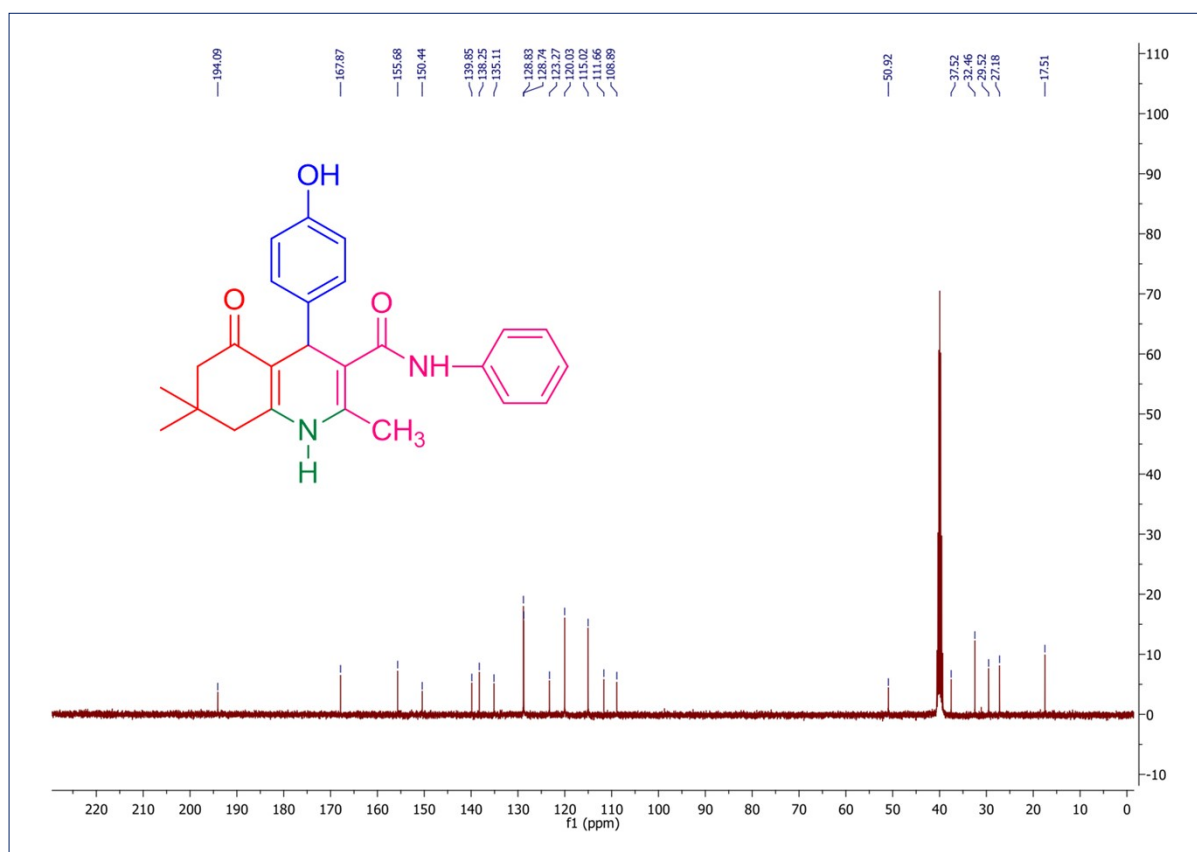

**Spectrum 28 :**  $^{13}\text{C}$  Spectrum of 4-(4-hydroxyphenyl)-2,7,7-trimethyl-5-oxo-N-phenyl-1,4,5,6,7,8-hexahydroquinoline-3-carboxamide (5h)



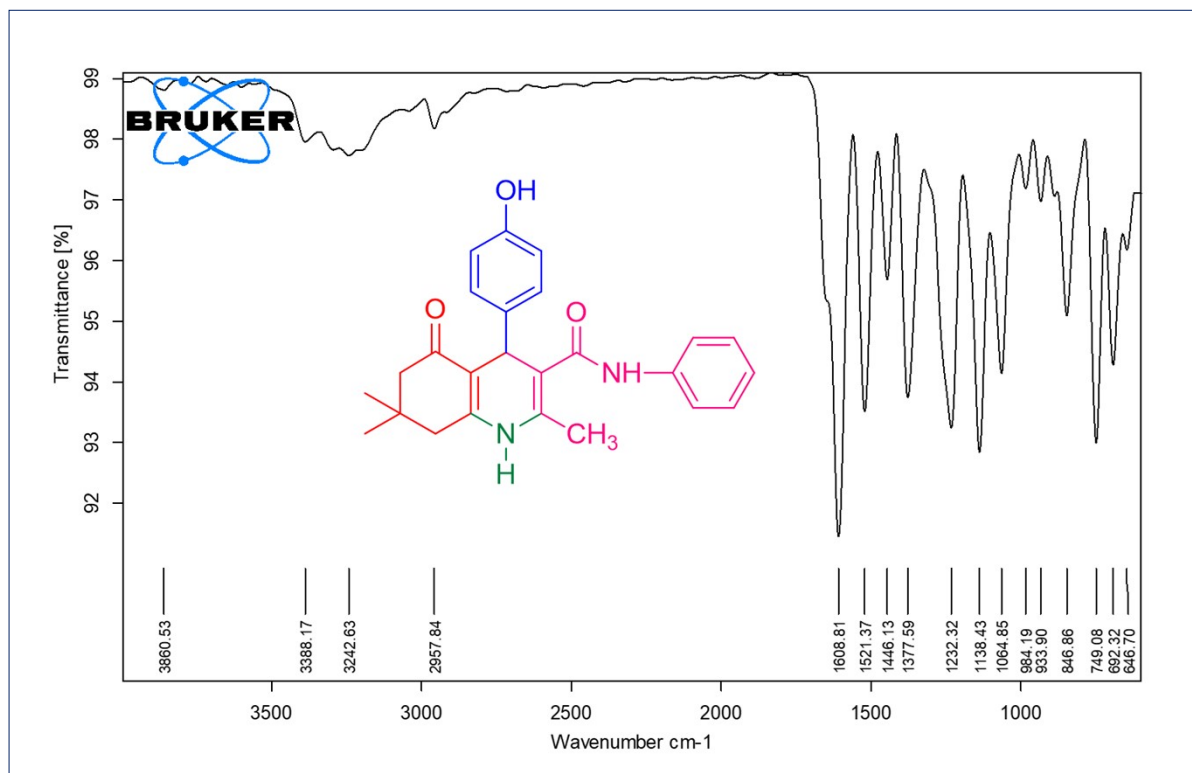

**Spectrum 29** : FTIR Spectrum of 4-(4-hydroxyphenyl)-2,7,7-trimethyl-5-oxo-N-phenyl-1,4,5,6,7,8-hexahydroquinoline -3-carboxamide (5h)

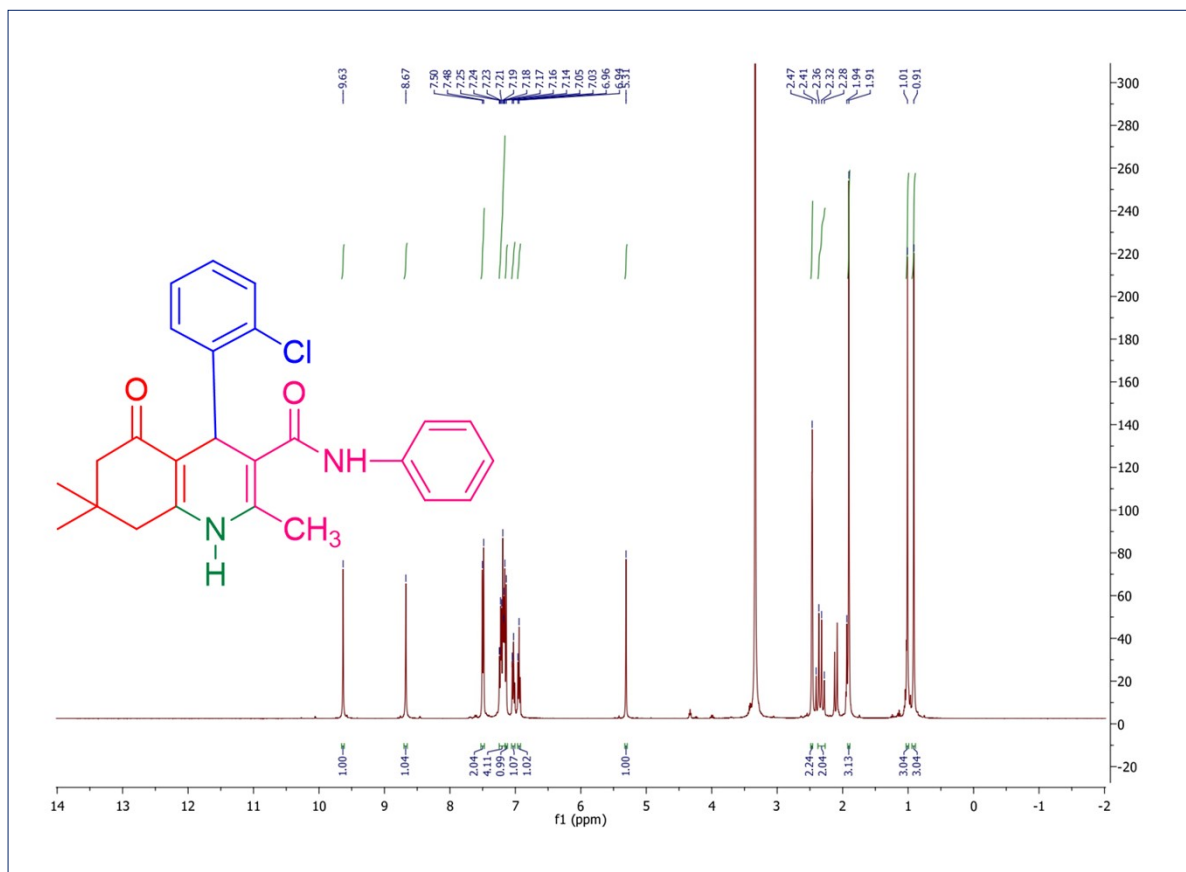

**Spectrum 30 :** <sup>1</sup>H Spectrum of 4-(2-chlorophenyl)-2,7,7-trimethyl-5-oxo-N-phenyl-1,4,5,6,7,8-hexahydroquinoline-3-carboxamide (5i)

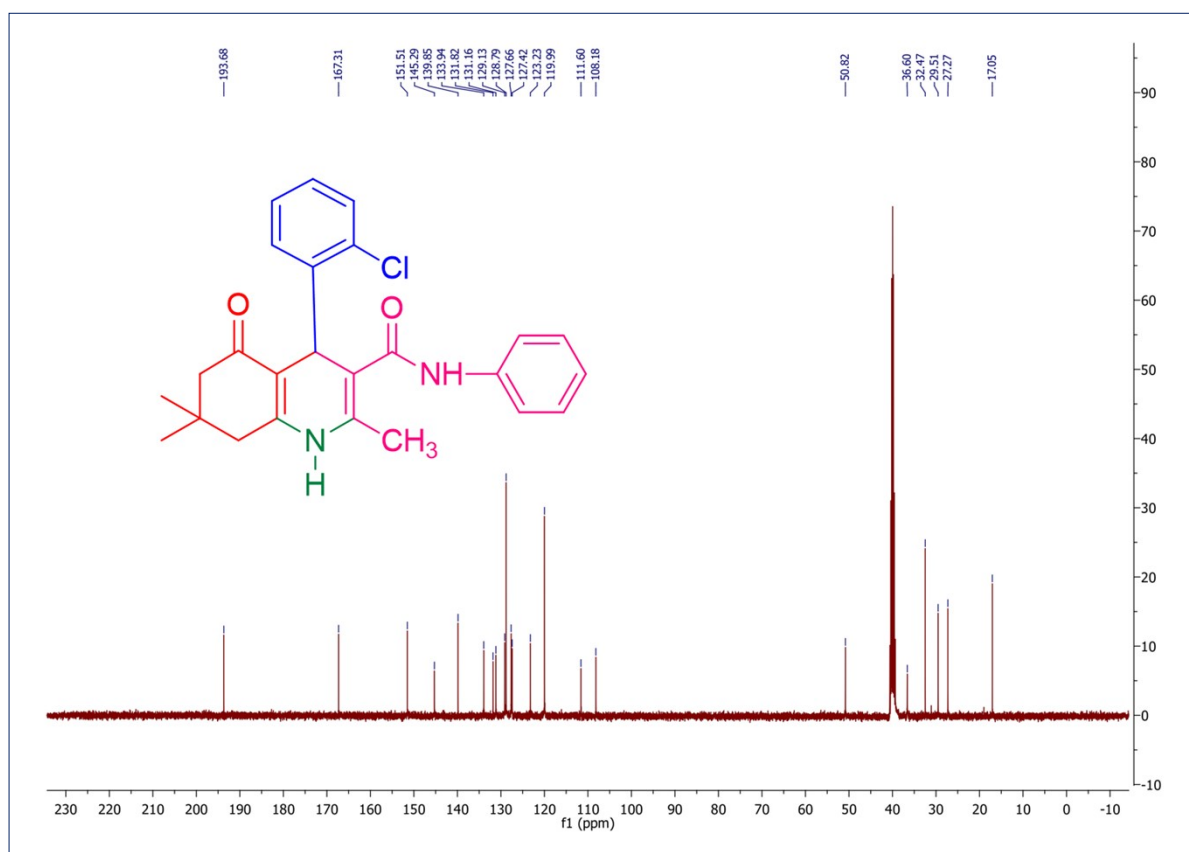

**Spectrum 31 :**  $^{13}\text{C}$  Spectrum of 4-(2-chlorophenyl)-2,7,7-trimethyl-5-oxo-N-phenyl-1,4,5,6,7,8-hexahydroquinoline-3-carboxamide (5i)

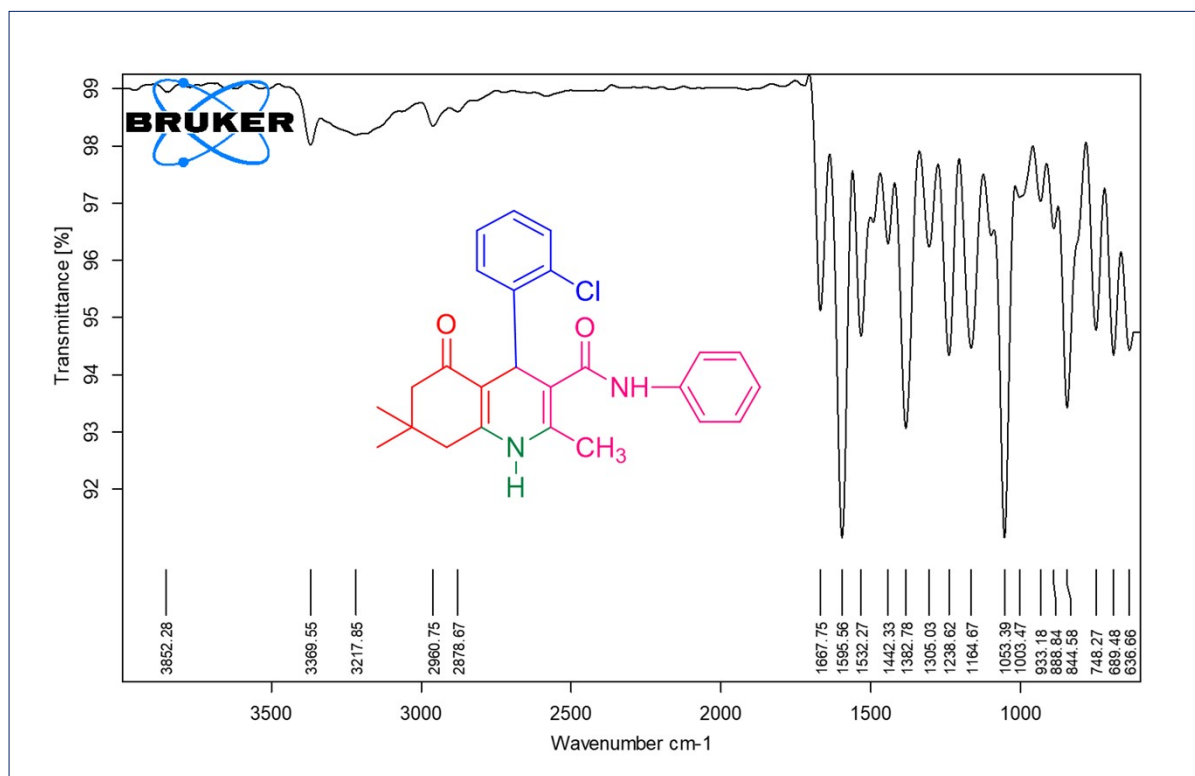

**Spectrum 32** : FTIR Spectrum of 4-(2-chlorophenyl)-2,7,7-trimethyl-5-oxo-N-phenyl-1,4,5,6,7,8-hexahydroquinoline-3-carboxamide (5i)

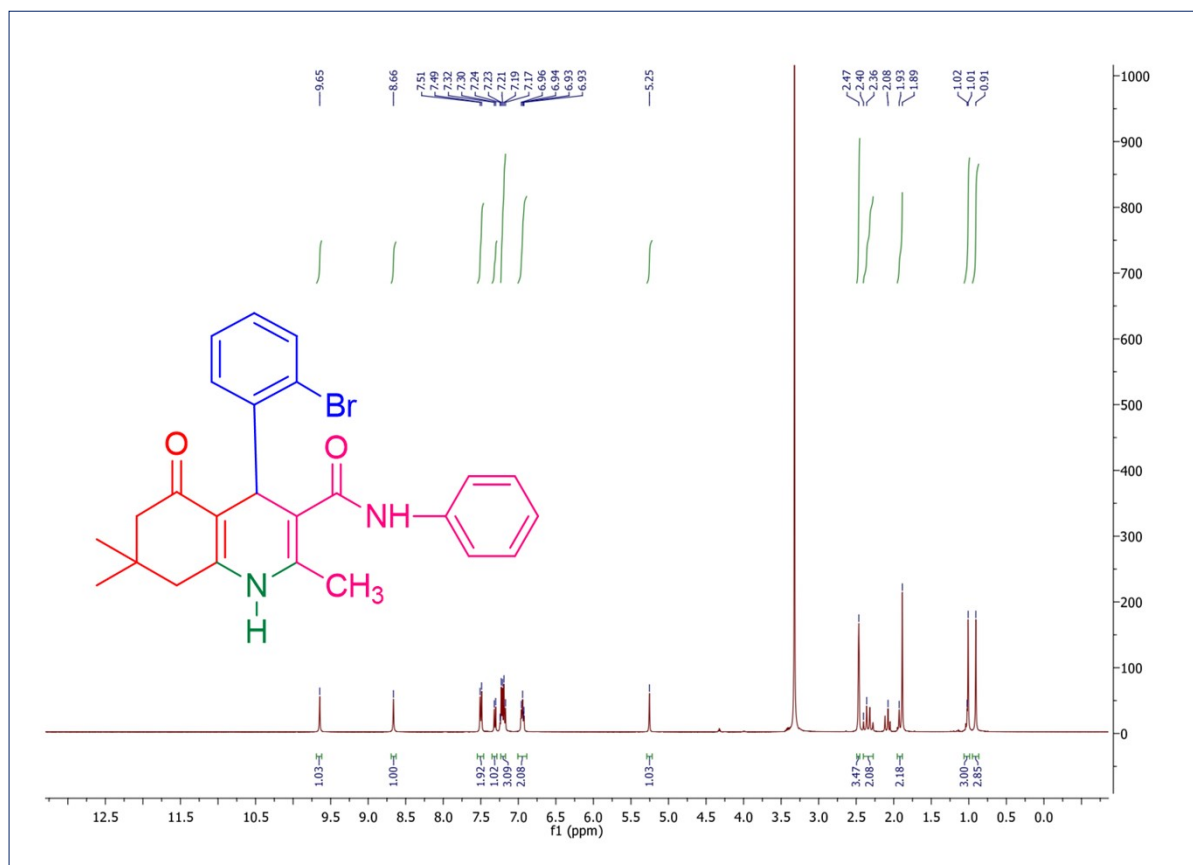

**Spectrum 33 :** <sup>1</sup>H Spectrum of 4-(2-bromophenyl)-2,7,7-trimethyl-5-oxo-N-phenyl-1,4,5,6,7,8-hexahydroquinoline-3-carboxamide (5j)

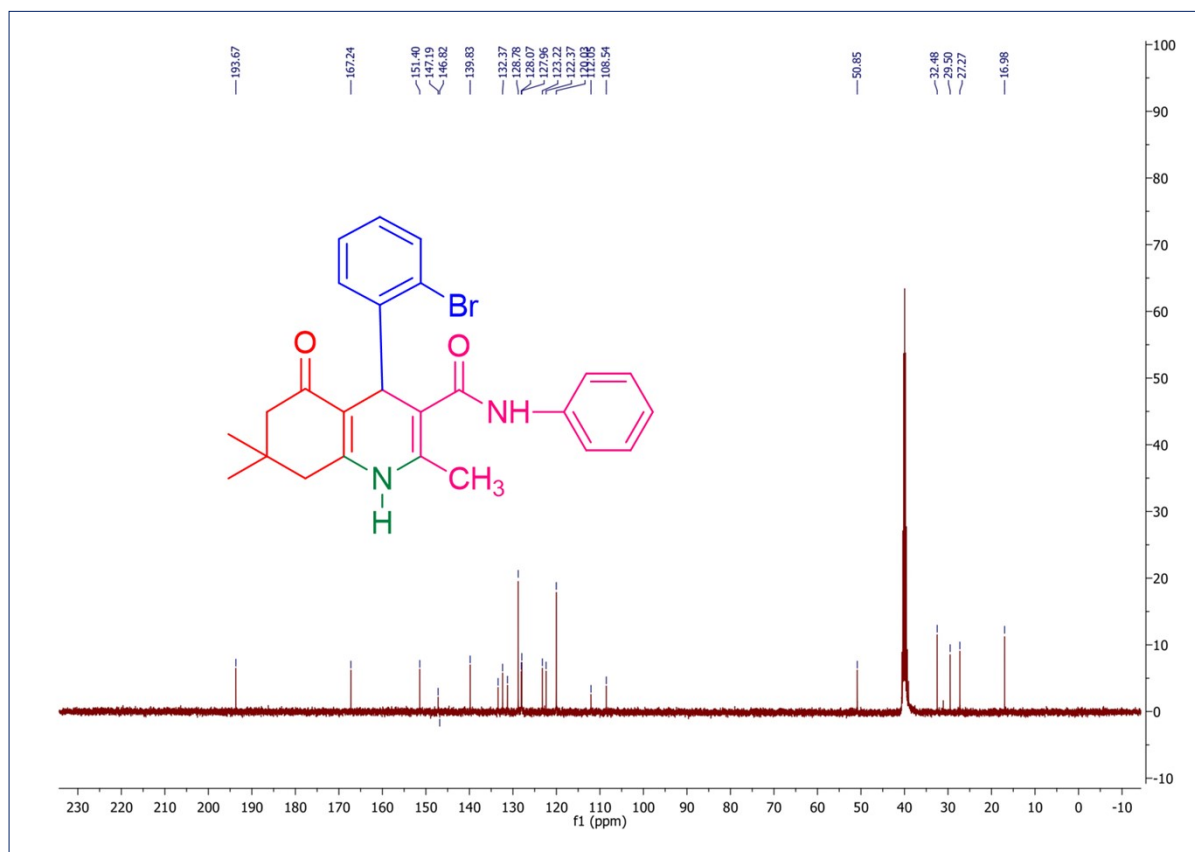

**Spectrum 34 :** <sup>13</sup>C Spectrum of 4-(2-bromophenyl)-2,7,7-trimethyl-5-oxo-N-phenyl-1,4,5,6,7,8-hexahydroquinoline -3-carboxamide (5j)

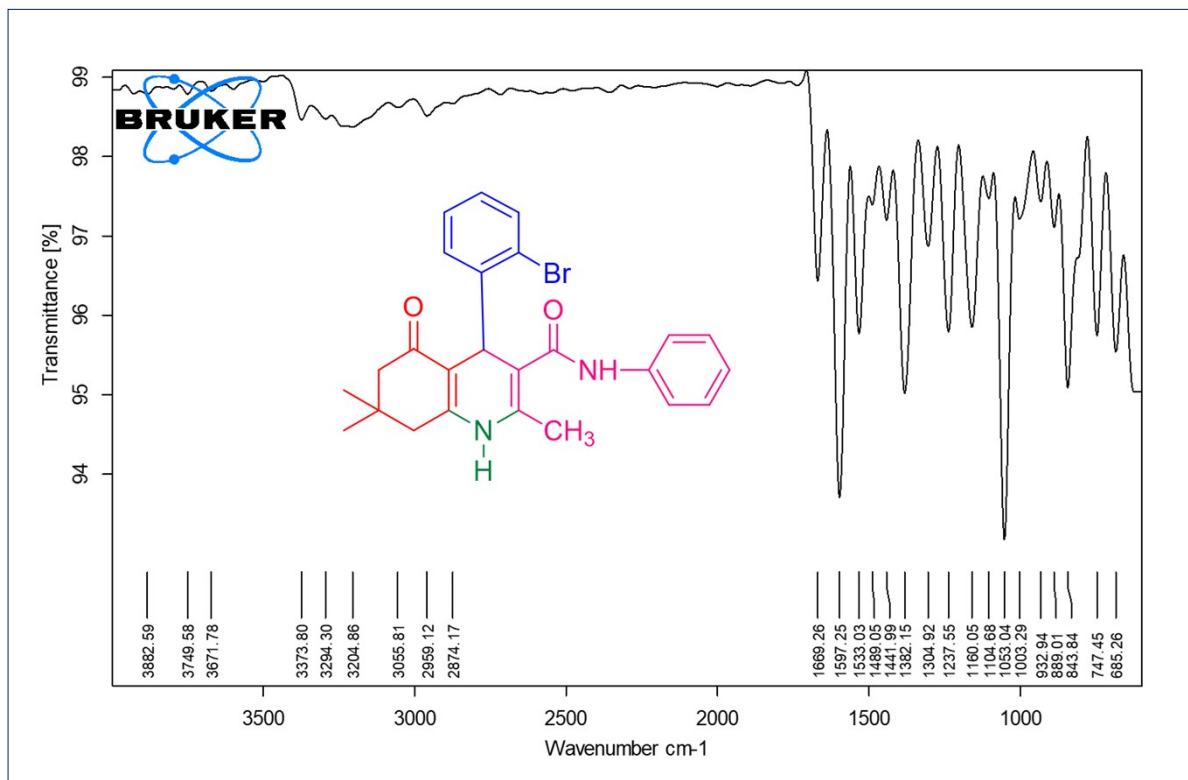

**Spectrum 35** : FTIR Spectrum of 4-(2-bromophenyl)-2,7,7-trimethyl-5-oxo-N-phenyl-1,4,5,6,7,8-hexahydroquinoline -3-carboxamide (5j)

## Spectral data of represented hexahydroquinoline-3-carboxamide derivatives

### 4-(phenyl)-2,7,7-trimethyl-5-oxo-N-phenyl-1,4,5,6,7,8-hexahydroquinoline-3-carboxamide (5a)

White solid; M.P. : 245-247 °C

IR ( $\nu_{\max}$   $\text{cm}^{-1}$ ): 3319 (N-H stretch), 2960 (aliphatic C-H stretch), 1608 (C=O), 1546 (C=O), 1441 (C=C stretch), 753  $\text{cm}^{-1}$  (aromatic C-H out of plane bending).

$^1\text{H}$  NMR (400 MHz, - DMSO,  $\delta$  ppm) : 9.48 (s, 1H), 8.65 (s, 1H), 7.50 (d,  $J = 7.7$  Hz, 2H), 7.19 (t,  $J = 7.9$  Hz, 2H), 7.14 (d,  $J = 4.4$  Hz, 3H), 7.03 (dd,  $J = 8.7, 4.5$  Hz, 1H), 6.95 (t,  $J = 7.4$  Hz, 1H), 4.93 (s, 1H), 2.48 – 2.46 (m, 3H), 2.39 – 2.29 (m, 2H), 2.01 (s, 2H), 1.00 (s, 3H), 0.87 (s, 3H).

$^{13}\text{C}$  NMR (101 MHz, DMSO,  $\delta$  ppm) : 194.05 (s), 167.74 (s), 150.91 (s), 147.54 (s), 139.82 (s), 135.36 (s), 128.84 (s), 128.26 (s), 127.83 (s), 126.07 (s), 123.31 (s), 120.06 (s), 111.36 (s), 108.42 (s), 50.86 (s), 32.48 (s), 29.50 (s), 27.21 (s), 17.52 (s).

Mass of  $\text{C}_{25}\text{H}_{26}\text{N}_2\text{O}_2$ ,  $\text{M}^+$  : 387.36.

### 4-(4-methoxyphenyl)-2,7,7-trimethyl-5-oxo-N-phenyl-1,4,5,6,7,8-hexahydroquinoline-3-carboxamide (5b)

White solid; M.P. : 246-248 °C

IR ( $\nu_{\max}$   $\text{cm}^{-1}$ ): 3352 (N-H stretch), 2960 (aliphatic C-H stretch), 1659 (C=O), 1599 (C=O), 1443 (C=C stretch), 754  $\text{cm}^{-1}$  (aromatic C-H out of plane bending).

$^1\text{H}$  NMR (400 MHz, - DMSO,  $\delta$  ppm) : 9.48 (s, 1H), 8.64 (s, 1H), 7.54 (s, 2H), 7.23 (s, 2H), 7.09 (d,  $J = 8.6$  Hz, 2H), 6.98 (t,  $J = 7.2$  Hz, 1H), 6.74 (d,  $J = 8.7$  Hz, 2H), 4.91 (s, 1H), 3.66 (s, 3H), 2.51 – 2.49 (m, 3H), 2.38 – 2.28 (m, 2H), 2.05 (s, 2H), 1.03 (s, 3H), 0.91 (s, 3H).

$^{13}\text{C}$  NMR (101 MHz, DMSO,  $\delta$  ppm) : 194.03 (s), 167.79 (s), 157.72 (s), 150.54 (s), 139.88 (d,  $J = 1.4$  Hz), 135.25 (s), 128.82 (d,  $J = 1.6$  Hz), 123.26 (s), 120.03 (s), 113.65 (s), 111.53 (s), 108.75 (s), 55.29 (s), 50.90 (s), 41.18 – 40.86 (m), 40.51 (d,  $J = 21.0$  Hz), 40.20 (s), 39.99 (s), 39.78 (s), 39.57 (s), 39.36 (s), 37.61 (s), 32.47 (s), 29.51 (s), 27.23 (s), 17.53 (s).

Mass of  $\text{C}_{26}\text{H}_{28}\text{N}_2\text{O}_3$ ,  $\text{M}^+$  : 417.39.

### 4-(4-methylphenyl)-2,7,7-trimethyl-5-oxo-N-phenyl-1,4,5,6,7,8-hexahydroquinoline-3-carboxamide (5c)

White solid; M.P. : 252-255 °C

IR ( $\nu_{\max}$   $\text{cm}^{-1}$ ): 3341 (N-H stretch), 2960 (aliphatic C-H stretch), 1656 (C=O), 1598 (C=O), 1441 (C=C stretch), 757  $\text{cm}^{-1}$  (aromatic C-H out of plane bending).

$^1\text{H}$  NMR (400 MHz, - DMSO,  $\delta$  ppm) : 9.48 (s, 1H), 8.64 (s, 1H), 7.55 (d,  $J = 7.6$  Hz, 2H), 7.23 (t,  $J = 7.9$  Hz, 2H), 7.05 (d,  $J = 8.0$  Hz, 2H), 6.98 (t,  $J = 7.3$  Hz, 3H), 4.92 (s, 1H), 2.51 –



2.49 (m, 3H), 2.39 – 2.28 (m, 2H), 2.17 (d, J = 9.4 Hz, 3H), 2.04 (s, 2H), 1.03 (s, 3H), 0.91 (s, 3H).

<sup>13</sup>C NMR (101 MHz, DMSO, δ ppm) : 194.00 (s), 167.76 (s), 150.70 (s), 144.69 (s), 139.87 (s), 135.25 (s), 134.91 (s), 128.84 (d, J = 1.2 Hz), 127.77 (s), 123.26 (s), 120.02 (s), 111.48 (s), 108.58 (s), 50.89 (s), 32.47 (s), 29.52 (s), 27.22 (s), 21.00 (s), 17.52 (s).

Mass of C<sub>26</sub>H<sub>28</sub>N<sub>2</sub>O<sub>2</sub>, M<sup>+</sup> : 401.37.

**4-(4-bromophenyl)-2,7,7-trimethyl-5-oxo-N-phenyl-1,4,5,6,7,8-hexahydroquinoline-3-carboxamide (5d)**

White solid; M.P. : 228-230 °C

IR (ν<sub>max</sub> cm<sup>-1</sup>): 3373 (N-H stretch), 2959 (aliphatic C-H stretch), 1669 (C=O), 1597 (C=O), 1441 (C=C stretch), 747 cm<sup>-1</sup> (aromatic C-H out of plane bending).

<sup>1</sup>H NMR (400 MHz, - DMSO, δ ppm) : 9.55 (s, 1H), 8.73 (s, 1H), 7.52 (d, J = 7.8 Hz, 2H), 7.36 (d, J = 8.3 Hz, 2H), 7.22 (t, J = 7.8 Hz, 2H), 7.10 (d, J = 8.3 Hz, 2H), 6.97 (t, J = 7.4 Hz, 1H), 4.93 (s, 1H), 2.48 (d, J = 1.6 Hz, 3H), 2.39 – 2.27 (m, 2H), 2.03 (s, 2H), 1.01 (s, 3H), 0.88 (s, 3H).

<sup>13</sup>C NMR (101 MHz, DMSO, δ ppm) : 194.05 (s), 167.52 (s), 151.03 (s), 146.87 (s), 139.73 (s), 135.61 (s), 131.11 (s), 130.12 (s), 128.86 (s), 123.39 (s), 120.09 (s), 119.15 (s), 110.87 (s), 108.06 (s), 50.79 (s), 38.25 (s), 32.49 (s), 29.41 (s), 27.24 (s), 17.52 (s), 14.52 (s).

Mass of C<sub>25</sub>H<sub>25</sub>N<sub>2</sub>O<sub>2</sub>Br, M<sup>+</sup> : 467.28.

**4-(4-fluorophenyl)-2,7,7-trimethyl-5-oxo-N-phenyl-1,4,5,6,7,8-hexahydroquinoline-3-carboxamide (5e)**

White solid; M.P. : 205-207 °C

IR (ν<sub>max</sub> cm<sup>-1</sup>): 3378 (N-H stretch), 2957 (aliphatic C-H stretch), 1668 (C=O), 1596 (C=O), 1441 (C=C stretch), 746 cm<sup>-1</sup> (aromatic C-H out of plane bending).

<sup>1</sup>H NMR (400 MHz, - DMSO, δ ppm) : 9.51 (s, 1H), 8.68 (s, 1H), 7.50 (d, J = 8.4 Hz, 2H), 7.23 – 7.13 (m, 4H), 6.96 (dd, J = 10.1, 6.6 Hz, 3H), 4.94 (s, 1H), 2.49 – 2.31 (m, 3H), 2.16 – 2.04 (m, 2H), 2.02 (s, 2H), 0.99 (s, 3H), 0.86 (s, 3H).

<sup>13</sup>C NMR (101 MHz, DMSO, δ ppm) : 194.06 (s), 167.63 (s), 162.07 (s), 159.67 (s), 150.86 (s), 143.71 (s), 139.76 (s), 135.51 (s), 129.53 (d, J = 8.0 Hz), 128.84 (s), 123.36 (s), 120.10 (s), 114.95 (s), 114.74 (s), 111.18 (s), 108.40 (s), 50.82 (s), 37.88 (s), 32.47 (s), 29.43 (s), 27.20 (s), 17.52 (s).

Mass of C<sub>25</sub>H<sub>25</sub>N<sub>2</sub>O<sub>2</sub>F, M<sup>+</sup> : 405.37.

**4-(4-chlorophenyl)-2,7,7-trimethyl-5-oxo-N-phenyl-1,4,5,6,7,8-hexahydroquinoline-3-carboxamide (5f)**

White solid; M.P. : 255-257 °C

IR (ν<sub>max</sub> cm<sup>-1</sup>): 3369 (N-H stretch), 2960 (aliphatic C-H stretch), 1667 (C=O), 1595 (C=O), 1442 (C=C stretch), 748 cm<sup>-1</sup> (aromatic C-H out of plane bending).

$^1\text{H}$  NMR (400 MHz, - DMSO,  $\delta$  ppm) : 9.54 (s, 1H), 8.71 (s, 1H), 7.50 (d,  $J = 7.6$  Hz, 2H), 7.20 (t,  $J = 7.8$  Hz, 4H), 7.14 (d,  $J = 8.5$  Hz, 2H), 6.95 (t,  $J = 7.4$  Hz, 1H), 4.93 (s, 1H), 2.48 – 2.30 (m, 3H), 2.14 – 2.02 (m, 2H), 2.00 (d,  $J = 16.4$  Hz, 2H), 0.99 (s, 3H), 0.86 (s, 3H).

$^{13}\text{C}$  NMR (101 MHz, DMSO,  $\delta$  ppm) : 194.07 (s), 167.54 (s), 151.03 (s), 146.44 (s), 139.73 (s), 135.61 (s), 130.62 (s), 129.69 (s), 128.86 (s), 128.20 (s), 123.39 (s), 120.10 (s), 110.93 (s), 108.12 (s), 50.79 (s), 38.16 (s), 32.48 (s), 29.41 (s), 27.21 (s), 17.52 (s).

**4-(4-nitrophenyl)-2,7,7-trimethyl-5-oxo-N-phenyl-1,4,5,6,7,8-hexahydroquinoline-3-carboxamide (5g)**

Orange yellow solid; M.P. : 207-210 °C

IR ( $\nu_{\text{max}}$   $\text{cm}^{-1}$ ): 3377 (N-H stretch), 2960 (aliphatic C-H stretch), 1666 (C=O), 1595 (C=O), 1442 (C=C stretch), 745  $\text{cm}^{-1}$  (aromatic C-H out of plane bending).

$^1\text{H}$  NMR (400 MHz, - DMSO,  $\delta$  ppm) : 9.61 (s, 1H), 8.84 (s, 1H), 8.06 (d,  $J = 8.7$  Hz, 2H), 7.49 (d,  $J = 7.7$  Hz, 2H), 7.40 (d,  $J = 8.7$  Hz, 2H), 7.20 (t,  $J = 7.8$  Hz, 2H), 6.95 (d,  $J = 7.4$  Hz, 1H), 5.06 (s, 1H), 2.48 – 2.45 (m, 3H), 2.34 (d,  $J = 14.5$  Hz, 2H), 2.04 (s, 2H), 1.00 (s, 3H), 0.85 (s, 3H).

$^{13}\text{C}$  NMR (101 MHz, DMSO,  $\delta$  ppm) : 194.07 (s), 167.24 (s), 154.93 (s), 151.50 (s), 146.09 (s), 139.60 (s), 136.24 (s), 129.08 (s), 128.88 (s), 123.57 (d,  $J = 13.7$  Hz), 120.13 (s), 110.16 (s), 107.54 (s), 50.67 (s), 32.50 (s), 29.33 (s), 27.22 (s), 17.57 (s).

**4-(4-hydroxyphenyl)-2,7,7-trimethyl-5-oxo-N-phenyl-1,4,5,6,7,8-hexahydroquinoline-3-carboxamide (5h)**

White solid; M.P. : > 300 °C

IR ( $\nu_{\text{max}}$   $\text{cm}^{-1}$ ): 3388 (N-H stretch), 2957 (aliphatic C-H stretch), 1608 (C=O), 1521 (C=O), 1446 (C=C stretch), 749  $\text{cm}^{-1}$  (aromatic C-H out of plane bending).

$^1\text{H}$  NMR (400 MHz, - DMSO,  $\delta$  ppm) : 9.39 (s, 1H), 9.00 (s, 1H), 8.58 (s, 1H), 7.50 (d,  $J = 7.7$  Hz, 2H), 7.19 (t,  $J = 7.9$  Hz, 2H), 6.98 – 6.89 (m, 3H), 6.52 (d,  $J = 8.5$  Hz, 2H), 4.80 (s, 1H), 2.49 – 2.41 (m, 3H), 2.29 (dd,  $J = 36.1, 16.8$  Hz, 2H), 2.06 (d,  $J = 13.2$  Hz, 2H), 0.99 (s, 3H), 0.87 (s, 3H).

$^{13}\text{C}$  NMR (101 MHz, DMSO,  $\delta$  ppm) : 194.09 (s), 167.87 (s), 155.68 (s), 150.44 (s), 139.85 (s), 138.25 (s), 135.11 (s), 128.79 (d,  $J = 9.0$  Hz), 123.27 (s), 120.03 (s), 115.02 (s), 111.66 (s), 108.89 (s), 50.92 (s), 37.52 (s), 32.46 (s), 29.52 (s), 27.18 (s), 17.51 (s).

**4-(2-chlorophenyl)-2,7,7-trimethyl-5-oxo-N-phenyl-1,4,5,6,7,8-hexahydroquinoline-3-carboxamide (5i)**

White solid; M.P. : 228-230 °C

IR ( $\nu_{\text{max}}$   $\text{cm}^{-1}$ ): 3369 (N-H stretch), 2960 (aliphatic C-H stretch), 1667 (C=O), 1595 (C=O), 1442 (C=C stretch), 748  $\text{cm}^{-1}$  (aromatic C-H out of plane bending).

$^1\text{H}$  NMR (400 MHz, - DMSO,  $\delta$  ppm) : 9.63 (s, 1H), 8.67 (s, 1H), 7.49 (d,  $J = 7.8$  Hz, 2H), 7.20 (ddd,  $J = 13.0, 7.6, 3.2$  Hz, 4H), 7.14 (s, 1H), 7.03 (dd,  $J = 10.9, 4.2$  Hz, 1H), 6.94 (t,  $J = 7.3$  Hz, 1H), 5.31 (s, 1H), 2.47 (s, 2H), 2.38 – 2.27 (m, 2H), 1.91 (s, 3H), 1.02 (d,  $J = 6.1$  Hz, 3H), 0.91 (s, 3H).

$^{13}\text{C}$  NMR (101 MHz, DMSO,  $\delta$  ppm) : 193.68 (s), 167.31 (s), 151.51 (s), 145.29 (s), 139.85 (s), 133.94 (s), 131.82 (s), 131.16 (s), 129.13 (s), 128.79 (s), 127.66 (s), 127.42 (s), 123.23 (s), 119.99 (s), 111.60 (s), 108.18 (s), 50.82 (s), 36.60 (s), 32.47 (s), 29.51 (s), 27.27 (s), 17.05 (s).

**4-(2-bromophenyl)-2,7,7-trimethyl-5-oxo-N-phenyl-1,4,5,6,7,8-hexahydroquinoline-3-carboxamide (5j)**

White solid; M.P. : 241-242 °C

IR ( $\nu_{\text{max}}$   $\text{cm}^{-1}$ ): 3373 (N-H stretch), 2959 (aliphatic C-H stretch), 1669 (C=O), 1597 (C=O), 1441 (C=C stretch), 747  $\text{cm}^{-1}$  (aromatic C-H out of plane bending).

$^1\text{H}$  NMR (400 MHz, - DMSO,  $\delta$  ppm) : 9.65 (s, 1H), 8.66 (s, 1H), 7.50 (d,  $J = 8.1$  Hz, 2H), 7.31 (d,  $J = 7.9$  Hz, 1H), 7.23 – 7.17 (m, 3H), 6.94 (dd,  $J = 9.3, 5.0$  Hz, 2H), 5.25 (s, 1H), 2.47 (s, 3H), 2.38 (d,  $J = 16.8$  Hz, 2H), 1.93 (s, 2H), 1.02 (d,  $J = 5.2$  Hz, 3H), 0.91 (s, 3H).

$^{13}\text{C}$  NMR (101 MHz, DMSO,  $\delta$  ppm) : 193.67 (s), 167.24 (s), 151.40 (s), 147.19 (s), 139.83 (s), 133.41 (s), 132.37 (s), 131.25 (s), 128.78 (s), 128.01 (d,  $J = 11.0$  Hz), 123.22 (s), 122.37 (s), 120.03 (s), 112.05 (s), 108.54 (s), 50.85 (s), 32.48 (s), 29.50 (s), 27.27 (s), 16.98 (s).
